# Supplementary material for: Geographical and temporal distribution of SARS-CoV-2 globally: An attempt to correlate case fatality rate with the circulating dominant SARS-CoV-2 clades
Source: bioRxiv or medRxiv preprint supplement (doi:10.1101/2021.05.25.21257434), 2021-05-27
Supplement: Supplementary file [file media-1.pdf]

| <b>Continents</b> | <b>G</b>      | <b>GH</b>     | <b>GR</b>     | <b>GV</b>     | <b>GRY/B.1.1.7</b> | <b>L</b>    | <b>O</b>     | <b>S</b>     | <b>V</b>    | <b>B.1.351</b> | <b>P.1</b>  | <b>B.1.429+B.1.427</b> | <b>B.1.525</b> | <b>Total</b>  |
|-------------------|---------------|---------------|---------------|---------------|--------------------|-------------|--------------|--------------|-------------|----------------|-------------|------------------------|----------------|---------------|
| Asia              | 3155          | 7681          | 28544         | 219           | 1630               | 1039        | 3871         | 1377         | 284         | 104            | 9           | 80                     | 19             | 48012         |
| Africa            | 2716          | 995           | 3377          | 68            | 258                | 46          | 247          | 490          | 22          | 2222           | 0           | 0                      | 116            | 10557         |
| North America     | 43647         | 128115        | 30264         | 259           | 7626               | 694         | 2082         | 4679         | 540         | 183            | 102         | 17144                  | 123            | 235458        |
| South America     | 1011          | 1228          | 6087          | 35            | 263                | 20          | 169          | 93           | 35          | 2              | 496         | 24                     | 0              | 9463          |
| Europe            | 65836         | 43340         | 85301         | 137937        | 204407             | 3530        | 7769         | 2973         | 5154        | 2702           | 584         | 69                     | 585            | 560187        |
| Oceania           | 1223          | 1707          | 13901         | 77            | 259                | 71          | 512          | 892          | 330         | 52             | 5           | 28                     | 6              | 19063         |
| <b>Total</b>      | <b>117588</b> | <b>183066</b> | <b>167474</b> | <b>138595</b> | <b>214443</b>      | <b>5400</b> | <b>14650</b> | <b>10504</b> | <b>6365</b> | <b>5265</b>    | <b>1196</b> | <b>17345</b>           | <b>849</b>     | <b>882740</b> |

**Supplementary Table 1:** Worldwide frequency distribution of different clades of SARS-CoV-2

| Worldwide    | G             | GH            | GR            | GV            | GRY/B.1.1.7   | L           | O            | S            | V           | B.1.351     | P.1         | B.1.429+B.1.427 | B.1.525    | Total         |
|--------------|---------------|---------------|---------------|---------------|---------------|-------------|--------------|--------------|-------------|-------------|-------------|-----------------|------------|---------------|
| Dec, 2019    | 0             | 0             | 0             | 0             | 0             | 22          | 3            | 1            | 0           | 0           | 0           | 0               | 0          | 26            |
| Jan, 2020    | 16            | 4             | 7             | 6             | 0             | 263         | 153          | 195          | 5           | 0           | 0           | 0               | 0          | 649           |
| Feb, 2020    | 171           | 51            | 96            | 3             | 1             | 339         | 482          | 265          | 242         | 0           | 0           | 0               | 0          | 1650          |
| Mar, 2020    | 12029         | 13976         | 9402          | 12            | 0             | 3050        | 2082         | 5492         | 4168        | 0           | 0           | 0               | 0          | 50211         |
| Apr, 2020    | 12672         | 12142         | 14424         | 5             | 0             | 1377        | 1785         | 1973         | 1715        | 0           | 0           | 0               | 0          | 46093         |
| May, 2020    | 5225          | 8043          | 8963          | 7             | 4             | 165         | 984          | 658          | 135         | 0           | 0           | 0               | 0          | 24184         |
| Jun, 2020    | 5139          | 6795          | 9154          | 100           | 0             | 56          | 467          | 260          | 60          | 0           | 0           | 0               | 0          | 22031         |
| Jul, 2020    | 5082          | 4382          | 17784         | 165           | 0             | 34          | 375          | 112          | 22          | 0           | 0           | 4               | 0          | 27960         |
| Aug, 2020    | 4787          | 7104          | 18866         | 2025          | 0             | 13          | 277          | 112          | 9           | 0           | 0           | 0               | 0          | 33193         |
| Sep, 2020    | 4997          | 7201          | 12710         | 10674         | 6             | 6           | 435          | 64           | 5           | 0           | 0           | 8               | 0          | 36106         |
| Oct, 2020    | 6446          | 9624          | 12805         | 23376         | 70            | 3           | 532          | 22           | 1           | 44          | 0           | 7               | 0          | 52930         |
| Nov, 2020    | 10887         | 15428         | 15974         | 27053         | 2231          | 8           | 244          | 31           | 0           | 271         | 0           | 246             | 0          | 72373         |
| Dec, 2020    | 13874         | 20358         | 12971         | 31415         | 13140         | 5           | 598          | 206          | 3           | 743         | 94          | 1389            | 14         | 94810         |
| Jan, 2021    | 15476         | 30215         | 12964         | 26318         | 59471         | 39          | 1192         | 451          | 0           | 1667        | 271         | 5856            | 152        | 154072        |
| Feb, 2021    | 14382         | 36196         | 14218         | 13752         | 81867         | 17          | 2648         | 495          | 0           | 1625        | 475         | 7522            | 348        | 173545        |
| Mar, 2021    | 6405          | 11547         | 7136          | 3684          | 57653         | 3           | 2393         | 167          | 0           | 915         | 356         | 2313            | 335        | 92907         |
| <b>Total</b> | <b>117588</b> | <b>183066</b> | <b>167474</b> | <b>138595</b> | <b>214443</b> | <b>5400</b> | <b>14650</b> | <b>10504</b> | <b>6365</b> | <b>5265</b> | <b>1196</b> | <b>17345</b>    | <b>849</b> | <b>882740</b> |

**Supplementary Table 2:** Temporal distribution of different clades of SARS-CoV-2 globally

| No. | Asian country | G    | GH   | GR    | GV  | GRY/B.1.1.7 | L   | O   | S   | V  | B.1.351 | P.1 | B.1.429+B.1.427 | B.1.525 | Predominant Clade |
|-----|---------------|------|------|-------|-----|-------------|-----|-----|-----|----|---------|-----|-----------------|---------|-------------------|
| 1   | Afghanistan   | 3    | 13   | 0     | 0   | 0           | 0   | 0   | 0   | 0  | 0       | 0   | 0               | 0       | GH                |
| 2   | Armenia       | 0    | 0    | 13    | 0   | 0           | 0   | 2   | 0   | 0  | 0       | 0   | 0               | 0       | GR                |
| 3   | Bahrain       | 2    | 41   | 81    | 0   | 0           | 0   | 24  | 2   | 1  | 0       | 0   | 0               | 0       | GR                |
| 4   | Bangladesh    | 91   | 56   | 758   | 0   | 3           | 1   | 56  | 5   | 0  | 1       | 0   | 0               | 0       | GR                |
| 5   | Brunei        | 0    | 0    | 4     | 0   | 0           | 0   | 5   | 0   | 0  | 1       | 0   | 0               | 0       | S                 |
| 6   | Cambodia      | 5    | 9    | 3     | 0   | 7           | 3   | 11  | 18  | 2  | 0       | 0   | 2               | 0       | O                 |
| 7   | China         | 46   | 189  | 317   | 7   | 5           | 498 | 260 | 296 | 10 | 1       | 0   | 0               | 0       | L                 |
| 8   | Georgia       | 3    | 9    | 6     | 0   | 2           | 0   | 4   | 1   | 3  | 0       | 0   | 0               | 0       | GH                |
| 9   | Hong Kong     | 300  | 375  | 314   | 19  | 8           | 41  | 167 | 10  | 20 | 0       | 0   | 0               | 0       | GH                |
| 10  | India         | 1254 | 1342 | 2324  | 5   | 81          | 26  | 928 | 111 | 7  | 4       | 0   | 0               | 0       | GR                |
| 11  | Indonesia     | 37   | 528  | 155   | 0   | 7           | 61  | 40  | 5   | 0  | 0       | 0   | 0               | 0       | GH                |
| 12  | Iran          | 43   | 14   | 6     | 1   | 1           | 4   | 214 | 0   | 0  | 0       | 0   | 0               | 0       | O                 |
| 13  | Iraq          | 4    | 31   | 0     | 0   | 0           | 0   | 76  | 0   | 0  | 0       | 0   | 0               | 0       | O                 |
| 14  | Israel        | 283  | 715  | 1339  | 110 | 1101        | 12  | 32  | 13  | 14 | 52      | 0   | 5               | 0       | GR                |
| 15  | Japan         | 220  | 452  | 20642 | 16  | 88          | 158 | 155 | 198 | 8  | 13      | 8   | 16              | 11      | GR                |
| 16  | Jordan        | 9    | 75   | 449   | 0   | 44          | 0   | 2   | 5   | 10 | 0       | 0   | 0               | 2       | GR                |
| 17  | Kazakhstan    | 8    | 6    | 22    | 0   | 0           | 1   | 29  | 19  | 0  | 0       | 0   | 0               | 0       | O                 |
| 18  | Kuwait        | 8    | 12   | 1     | 0   | 1           | 0   | 10  | 0   | 0  | 0       | 0   | 0               | 0       | GH                |
| 19  | Lebanon       | 27   | 12   | 5     | 0   | 2           | 0   | 3   | 0   | 0  | 0       | 0   | 0               | 0       | G                 |
| 20  | Malaysia      | 208  | 52   | 36    | 1   | 3           | 31  | 100 | 3   | 2  | 4       | 0   | 0               | 2       | G                 |
| 21  | Mongolia      | 5    | 0    | 0     | 0   | 0           | 0   | 2   | 0   | 0  | 0       | 0   | 0               | 0       | G                 |
| 22  | Myanmar       | 2    | 31   | 3     | 0   | 0           | 0   | 5   | 0   | 0  | 0       | 0   | 0               | 0       | GH                |
| 23  | Nepal         | 0    | 7    | 7     | 0   | 0           | 1   | 0   | 0   | 0  | 0       | 0   | 0               | 0       | GH/GR             |
| 24  | Oman          | 21   | 12   | 142   | 0   | 1           | 5   | 17  | 5   | 2  | 0       | 0   | 0               | 0       | GR                |
| 25  | Pakistan      | 40   | 37   | 6     | 1   | 3           | 3   | 15  | 3   | 0  | 0       | 0   | 0               | 0       | G                 |
| 26  | Palestine     | 6    | 10   | 78    | 0   | 0           | 0   | 2   | 0   | 2  | 0       | 0   | 0               | 0       | GR                |
| 27  | Philippines   | 25   | 3    | 94    | 0   | 39          | 2   | 25  | 0   | 0  | 0       | 0   | 0               | 0       | GR                |
| 28  | Qatar         | 0    | 0    | 0     | 0   | 0           | 0   | 16  | 0   | 0  | 0       | 0   | 0               | 0       | O                 |
| 29  | Saudi Arabia  | 59   | 522  | 80    | 0   | 0           | 0   | 254 | 38  | 0  | 0       | 0   | 0               | 0       | GH                |
| 30  | Singapore     | 141  | 257  | 243   | 12  | 69          | 114 | 984 | 39  | 23 | 13      | 0   | 3               | 2       | O                 |

|    |                      |             |             |              |            |             |             |             |             |            |            |          |           |           |              |
|----|----------------------|-------------|-------------|--------------|------------|-------------|-------------|-------------|-------------|------------|------------|----------|-----------|-----------|--------------|
| 31 | South Korea          | 69          | 2145        | 214          | 16         | 102         | 5           | 15          | 63          | 155        | 5          | 1        | 47        | 1         | <b>GH</b>    |
| 32 | Sri Lanka            | 51          | 109         | 4            | 1          | 18          | 0           | 48          | 2           | 0          | 1          | 0        | 0         | 0         | <b>GH</b>    |
| 33 | Taiwan               | 19          | 51          | 25           | 1          | 4           | 15          | 29          | 11          | 11         | 0          | 0        | 7         | 0         | <b>GH</b>    |
| 34 | Thailand             | 40          | 351         | 67           | 4          | 9           | 15          | 171         | 239         | 7          | 4          | 0        | 0         | 1         | <b>GH</b>    |
| 35 | Timor-Leste          | 0           | 0           | 0            | 0          | 0           | 0           | 18          | 0           | 1          | 0          | 0        | 0         | 0         | <b>O</b>     |
| 36 | United Arab Emirates | 117         | 182         | 1033         | 24         | 21          | 36          | 148         | 279         | 1          | 5          | 0        | 0         | 0         | <b>GR</b>    |
| 37 | Uzbekistan           | 0           | 0           | 0            | 0          | 0           | 0           | 2           | 0           | 0          | 0          | 0        | 0         | 0         | <b>O</b>     |
| 38 | Vietnam              | 9           | 33          | 73           | 1          | 11          | 7           | 2           | 12          | 5          | 0          | 0        | 0         | 0         | <b>GR</b>    |
|    |                      |             |             |              |            |             |             |             |             |            |            |          |           |           |              |
|    | <b>Total</b>         | <b>3155</b> | <b>7681</b> | <b>28544</b> | <b>219</b> | <b>1630</b> | <b>1039</b> | <b>3871</b> | <b>1377</b> | <b>284</b> | <b>104</b> | <b>9</b> | <b>80</b> | <b>19</b> | <b>48012</b> |

| No. | African country                 | G   | GH  | GR  | GV | GRY/B.1.1.7 | L  | O  | S  | V | B.1.351 | P.1 | B.1.429+B.1.427 | B.1.525 | Predominant Clade |
|-----|---------------------------------|-----|-----|-----|----|-------------|----|----|----|---|---------|-----|-----------------|---------|-------------------|
| 1   | Algeria                         | 10  | 9   | 4   | 0  | 0           | 0  | 6  | 0  | 0 | 0       | 0   | 0               | 0       | G                 |
| 2   | Benin                           | 2   | 4   | 0   | 0  | 0           | 0  | 3  | 3  | 0 | 0       | 0   | 0               | 0       | GH                |
| 3   | Botswana                        | 1   | 6   | 7   | 0  | 0           | 0  | 0  | 1  | 0 | 53      | 0   | 0               | 0       | B.1.351           |
| 4   | Burkina Faso                    | 5   | 7   | 20  | 0  | 0           | 0  | 0  | 62 | 0 | 0       | 0   | 0               | 0       | S                 |
| 5   | Cameroon                        | 17  | 5   | 16  | 2  | 0           | 0  | 0  | 0  | 0 | 1       | 0   | 0               | 1       | G                 |
| 6   | Cote d'Ivoire                   | 7   | 16  | 2   | 0  | 0           | 0  | 0  | 40 | 0 | 0       | 0   | 0               | 0       | S                 |
| 7   | Democratic Republic of the Cong | 296 | 22  | 39  | 0  | 2           | 0  | 2  | 7  | 2 | 1       | 0   | 0               | 0       | G                 |
| 8   | Egypt                           | 57  | 150 | 160 | 0  | 0           | 16 | 53 | 11 | 0 | 0       | 0   | 0               | 0       | GR                |
| 9   | Equatorial Guinea               | 114 | 2   | 1   | 0  | 0           | 0  | 0  | 2  | 0 | 0       | 0   | 0               | 0       | G                 |
| 10  | Eswatini                        | 4   | 0   | 1   | 0  | 0           | 0  | 0  | 0  | 0 | 17      | 0   | 0               | 0       | B.1.351           |
| 11  | Ethiopia                        | 0   | 0   | 0   | 0  | 0           | 0  | 4  | 0  | 0 | 0       | 0   | 0               | 0       | O                 |
| 12  | Gabon                           | 1   | 1   | 0   | 0  | 0           | 0  | 5  | 2  | 0 | 0       | 0   | 0               | 0       | O                 |
| 13  | Gambia                          | 332 | 20  | 122 | 0  | 3           | 0  | 1  | 0  | 0 | 0       | 0   | 0               | 0       | G                 |
| 14  | Ghana                           | 19  | 47  | 169 | 4  | 116         | 0  | 11 | 32 | 0 | 4       | 0   | 0               | 6       | GR                |
| 15  | Guinea                          | 6   | 1   | 0   | 0  | 0           | 0  | 0  | 1  | 0 | 0       | 0   | 0               | 0       | G                 |
| 16  | Kenya                           | 454 | 94  | 78  | 0  | 1           | 1  | 20 | 29 | 3 | 6       | 0   | 0               | 0       | G                 |
| 17  | Lesotho                         | 4   | 0   | 1   | 0  | 0           | 0  | 0  | 0  | 0 | 13      | 0   | 0               | 0       | B.1.351           |
| 18  | Libya                           | 0   | 0   | 0   | 0  | 0           | 0  | 1  | 0  | 0 | 0       | 0   | 0               | 0       | O                 |
| 19  | Madagascar                      | 0   | 2   | 2   | 0  | 0           | 0  | 2  | 0  | 0 | 0       | 0   | 0               | 0       | GH/GR/O           |
| 20  | Mali                            | 2   | 5   | 0   | 0  | 0           | 0  | 3  | 14 | 0 | 0       | 0   | 0               | 0       | S                 |
| 21  | Martinique                      | 0   | 2   | 4   | 0  | 2           | 0  | 0  | 0  | 0 | 0       | 0   | 0               | 0       | GR                |
| 22  | Mauritius                       | 0   | 5   | 1   | 2  | 1           | 0  | 0  | 1  | 0 | 2       | 0   | 0               | 0       | GH                |
| 23  | Mayotte                         | 43  | 268 | 7   | 11 | 1           | 0  | 0  | 12 | 0 | 378     | 0   | 0               | 1       | B.1.351           |
| 24  | Morocco                         | 68  | 42  | 43  | 6  | 1           | 0  | 2  | 0  | 0 | 0       | 0   | 0               | 0       | G                 |
| 25  | Mozambique                      | 14  | 9   | 69  | 0  | 0           | 0  | 3  | 0  | 0 | 58      | 0   | 0               | 0       | GR                |
| 26  | Namibia                         | 7   | 0   | 40  | 0  | 0           | 0  | 4  | 0  | 0 | 7       | 0   | 0               | 0       | GR                |
| 27  | Nigeria                         | 46  | 62  | 203 | 1  | 125         | 0  | 4  | 29 | 9 | 0       | 0   | 0               | 103     | GR                |
| 28  | Republic of the Congo           | 19  | 20  | 2   | 0  | 0           | 0  | 12 | 0  | 0 | 0       | 0   | 0               | 0       | GH                |
| 29  | Reunion                         | 5   | 32  | 0   | 8  | 0           | 0  | 0  | 0  | 0 | 16      | 0   | 0               | 0       | GH                |
| 30  | Rwanda                          | 154 | 9   | 8   | 1  | 3           | 0  | 1  | 93 | 0 | 11      | 0   | 0               | 5       | G                 |
| 31  | Senegal                         | 137 | 26  | 44  | 0  | 1           | 25 | 33 | 4  | 0 | 0       | 0   | 0               | 0       | G                 |
| 32  | Sierra Leone                    | 1   | 2   | 2   | 0  | 0           | 0  | 1  | 5  | 0 | 0       | 0   | 0               | 0       | S                 |

|    |                      |             |            |             |           |            |           |            |            |           |             |          |          |            |              |
|----|----------------------|-------------|------------|-------------|-----------|------------|-----------|------------|------------|-----------|-------------|----------|----------|------------|--------------|
| 33 | South Africa         | 785         | 44         | 2019        | 14        | 1          | 4         | 31         | 5          | 5         | 1424        | 0        | 0        | 0          | GR           |
| 34 | Togo                 | 0           | 2          | 1           | 0         | 0          | 0         | 1          | 3          | 0         | 0           | 0        | 0        | 0          | S            |
| 35 | Tunisia              | 5           | 42         | 17          | 19        | 1          | 0         | 10         | 2          | 0         | 0           | 0        | 0        | 0          | GH           |
| 36 | Uganda               | 45          | 6          | 14          | 0         | 0          | 0         | 19         | 121        | 3         | 0           | 0        | 0        | 0          | S            |
| 37 | Union of the Comoros | 0           | 0          | 0           | 0         | 0          | 0         | 0          | 0          | 0         | 6           | 0        | 0        | 0          | B.1.351      |
| 38 | Zambia               | 8           | 6          | 161         | 0         | 0          | 0         | 11         | 4          | 0         | 31          | 0        | 0        | 0          | GR           |
| 39 | Zimbabwe             | 48          | 27         | 120         | 0         | 0          | 0         | 4          | 7          | 0         | 194         | 0        | 0        | 0          | B.1.351      |
|    |                      |             |            |             |           |            |           |            |            |           |             |          |          |            |              |
|    | <b>Total</b>         | <b>2716</b> | <b>995</b> | <b>3377</b> | <b>68</b> | <b>258</b> | <b>46</b> | <b>247</b> | <b>490</b> | <b>22</b> | <b>2222</b> | <b>0</b> | <b>0</b> | <b>116</b> | <b>10557</b> |

| No. | North America                  | G            | GH            | GR           | GV         | GRY/B.1.1.7 | L          | O           | S           | V          | B.1.351    | P.1        | B.1.429+B.1.427 | B.1.525    | Predominant clade |
|-----|--------------------------------|--------------|---------------|--------------|------------|-------------|------------|-------------|-------------|------------|------------|------------|-----------------|------------|-------------------|
| 1   | Antigua and Barbuda            | 0            | 1             | 0            | 0          | 0           | 0          | 0           | 0           | 0          | 0          | 0          | 0               | 0          | GH                |
| 2   | Barbados                       | 1            | 1             | 0            | 0          | 3           | 0          | 0           | 0           | 0          | 0          | 0          | 0               | 0          | GRY/B.1.1.7       |
| 3   | Belize                         | 0            | 2             | 2            | 0          | 0           | 0          | 0           | 0           | 0          | 0          | 0          | 0               | 0          | GH/GR             |
| 4   | Bermuda                        | 8            | 18            | 0            | 4          | 0           | 0          | 0           | 0           | 0          | 0          | 0          | 0               | 0          | GH                |
| 5   | British Virgin Islands         | 0            | 2             | 1            | 1          | 0           | 0          | 0           | 0           | 0          | 0          | 0          | 1               | 0          | GH                |
| 6   | Canada                         | 3072         | 11332         | 5995         | 31         | 612         | 30         | 80          | 506         | 127        | 20         | 37         | 13              | 11         | GH                |
| 7   | Cayman Islands                 | 1            | 0             | 0            | 0          | 2           | 0          | 0           | 0           | 0          | 0          | 0          | 0               | 0          | GRY/B.1.1.7       |
| 8   | Costa Rica                     | 56           | 65            | 136          | 0          | 2           | 0          | 0           | 24          | 0          | 2          | 0          | 3               | 1          | GR                |
| 9   | Cuba                           | 2            | 0             | 0            | 0          | 0           | 0          | 0           | 0           | 0          | 0          | 0          | 0               | 0          | G                 |
| 10  | Dominican Republic             | 1            | 3             | 0            | 0          | 1           | 0          | 4           | 0           | 0          | 0          | 0          | 0               | 0          | O                 |
| 11  | El Salvador                    | 0            | 6             | 0            | 0          | 0           | 0          | 0           | 0           | 0          | 0          | 0          | 0               | 0          | GH                |
| 12  | Guadeloupe                     | 13           | 23            | 6            | 3          | 6           | 0          | 0           | 0           | 0          | 1          | 0          | 3               | 0          | GH                |
| 13  | Guatemala                      | 9            | 14            | 2            | 0          | 0           | 0          | 4           | 1           | 0          | 0          | 0          | 0               | 0          | GH                |
| 14  | Jamaica                        | 0            | 3             | 0            | 1          | 4           | 0          | 1           | 0           | 4          | 0          | 0          | 0               | 0          | GH                |
| 15  | Mexico                         | 946          | 234           | 1980         | 4          | 22          | 2          | 38          | 20          | 0          | 0          | 3          | 105             | 0          | GR                |
| 16  | Panama                         | 141          | 28            | 3            | 1          | 0           | 0          | 7           | 388         | 2          | 1          | 0          | 0               | 0          | S                 |
| 17  | Saint Barthelemy               | 1            | 1             | 0            | 0          | 0           | 0          | 0           | 0           | 0          | 0          | 0          | 0               | 0          | G/GH              |
| 18  | Saint Kitts and Nevis          | 0            | 3             | 0            | 0          | 0           | 0          | 0           | 0           | 0          | 0          | 0          | 0               | 0          | GH                |
| 19  | Saint Lucia                    | 0            | 1             | 0            | 0          | 9           | 0          | 0           | 0           | 0          | 0          | 0          | 0               | 0          | GRY/B.1.1.7       |
| 20  | Saint Martin                   | 12           | 42            | 18           | 1          | 27          | 0          | 0           | 0           | 0          | 0          | 1          | 13              | 0          | GH                |
| 21  | Saint Vincent and the Grenadin | 0            | 1             | 0            | 0          | 0           | 0          | 0           | 0           | 0          | 0          | 0          | 0               | 0          | GH                |
| 22  | USA                            | 39384        | 116335        | 22121        | 213        | 6938        | 662        | 1948        | 3740        | 407        | 159        | 61         | 17006           | 111        | GH                |
|     | <b>Total</b>                   | <b>43647</b> | <b>128115</b> | <b>30264</b> | <b>259</b> | <b>7626</b> | <b>694</b> | <b>2082</b> | <b>4679</b> | <b>540</b> | <b>183</b> | <b>102</b> | <b>17144</b>    | <b>123</b> | <b>235458</b>     |

| No. | South America  | G           | GH          | GR          | GV        | GRY/B.1.1.7 | L         | O          | S         | V         | B.1.351  | P.1        | B.1.429+B.1.427 | B.1.525  | Predominant clade |
|-----|----------------|-------------|-------------|-------------|-----------|-------------|-----------|------------|-----------|-----------|----------|------------|-----------------|----------|-------------------|
| 1   | Argentina      | 46          | 385         | 215         | 0         | 1           | 1         | 9          | 1         | 3         | 0        | 0          | 0               | 0        | GH                |
| 2   | Aruba          | 29          | 103         | 88          | 16        | 65          | 0         | 1          | 0         | 2         | 2        | 0          | 16              | 0        | GH                |
| 3   | Bolivia        | 20          | 0           | 17          | 0         | 0           | 0         | 0          | 1         | 0         | 0        | 0          | 0               | 0        | G                 |
| 4   | Bonaire        | 0           | 10          | 0           | 2         | 56          | 0         | 0          | 0         | 0         | 0        | 0          | 0               | 0        | GRY/B.1.1.7       |
| 5   | Brazil         | 282         | 79          | 3513        | 4         | 54          | 4         | 139        | 8         | 15        | 0        | 440        | 0               | 0        | GR                |
| 6   | Chile          | 192         | 197         | 997         | 0         | 27          | 2         | 3          | 20        | 7         | 0        | 6          | 7               | 0        | GR                |
| 7   | Colombia       | 159         | 266         | 111         | 1         | 0           | 2         | 2          | 10        | 4         | 0        | 23         | 1               | 0        | GH                |
| 8   | Curacao        | 15          | 32          | 21          | 5         | 46          | 6         | 0          | 0         | 0         | 0        | 0          | 0               | 0        | GRY/B.1.1.7       |
| 9   | Ecuador        | 51          | 12          | 205         | 0         | 7           | 3         | 10         | 2         | 0         | 0        | 0          | 0               | 0        | GR                |
| 10  | French Guiana  | 0           | 87          | 53          | 4         | 3           | 0         | 0          | 1         | 0         | 0        | 4          | 0               | 0        | GH                |
| 11  | Guatemala      | 2           | 2           | 0           | 0         | 0           | 0         | 0          | 0         | 0         | 0        | 0          | 0               | 0        | G/GH              |
| 12  | Paraguay       | 7           | 1           | 7           | 0         | 0           | 0         | 0          | 0         | 0         | 0        | 0          | 0               | 0        | G                 |
| 13  | Peru           | 103         | 31          | 781         | 3         | 3           | 2         | 5          | 22        | 1         | 0        | 23         | 0               | 0        | GR                |
| 14  | Sint Eustatius | 0           | 4           | 0           | 0         | 0           | 0         | 0          | 0         | 0         | 0        | 0          | 0               | 0        | GH                |
| 15  | Suriname       | 66          | 0           | 5           | 0         | 0           | 0         | 0          | 0         | 0         | 0        | 0          | 0               | 0        | G                 |
| 16  | Trinidad       | 0           | 16          | 0           | 0         | 1           | 0         | 0          | 0         | 0         | 0        | 0          | 0               | 0        | GH                |
| 17  | Uruguay        | 30          | 1           | 73          | 0         | 0           | 0         | 0          | 28        | 3         | 0        | 0          | 0               | 0        | GR                |
| 18  | Venezuela      | 9           | 2           | 1           | 0         | 0           | 0         | 0          | 0         | 0         | 0        | 0          | 0               | 0        | G                 |
|     |                |             |             |             |           |             |           |            |           |           |          |            |                 |          |                   |
|     | <b>Total</b>   | <b>1011</b> | <b>1228</b> | <b>6087</b> | <b>35</b> | <b>263</b>  | <b>20</b> | <b>169</b> | <b>93</b> | <b>35</b> | <b>2</b> | <b>496</b> | <b>24</b>       | <b>0</b> | <b>9463</b>       |



| No. | Europe                 | G    | GH   | GR   | GV    | GRY/B.1.1.7 | L   | O   | S   | V   | B.1.351 | P.1 | B.1.429+B.1.427 | B.1.525 | Predominant clade |
|-----|------------------------|------|------|------|-------|-------------|-----|-----|-----|-----|---------|-----|-----------------|---------|-------------------|
| 1   | Albania                | 1    | 1    | 4    | 0     | 24          | 0   | 0   | 0   | 0   | 0       | 0   | 0               | 0       | GRY/B.1.1.7       |
| 2   | Andorra                | 0    | 0    | 0    | 0     | 0           | 0   | 1   | 0   | 0   | 0       | 0   | 0               | 0       | O                 |
| 3   | Austria                | 771  | 520  | 617  | 177   | 400         | 28  | 24  | 16  | 17  | 166     | 0   | 2               | 3       | G                 |
| 4   | Azerbaijan             | 0    | 0    | 7    | 0     | 0           | 0   | 2   | 0   | 0   | 0       | 0   | 0               | 0       | GR                |
| 5   | Belarus                | 11   | 16   | 10   | 0     | 1           | 0   | 2   | 0   | 0   | 0       | 0   | 0               | 0       | GH                |
| 6   | Belgium                | 2517 | 1353 | 1422 | 976   | 2760        | 68  | 404 | 42  | 70  | 425     | 87  | 1               | 11      | GRY/B.1.1.7       |
| 7   | Bosnia and Herzegovina | 41   | 13   | 11   | 1     | 21          | 0   | 2   | 0   | 1   | 0       | 0   | 0               | 0       | G                 |
| 8   | Bulgaria               | 122  | 44   | 30   | 21    | 342         | 1   | 0   | 0   | 0   | 0       | 0   | 0               | 0       | GRY/B.1.1.7       |
| 9   | Croatia                | 299  | 56   | 93   | 128   | 182         | 0   | 92  | 0   | 0   | 6       | 0   | 0               | 0       | G                 |
| 10  | Cyprus                 | 81   | 18   | 15   | 9     | 10          | 0   | 0   | 0   | 0   | 0       | 0   | 0               | 0       | G                 |
| 11  | Czech Republic         | 418  | 62   | 192  | 12    | 343         | 9   | 194 | 3   | 4   | 1       | 0   | 0               | 0       | G                 |
| 12  | Denmark                | 9237 | 7389 | 7189 | 21478 | 4889        | 49  | 31  | 100 | 5   | 12      | 0   | 25              | 121     | GV                |
| 13  | Estonia                | 117  | 15   | 137  | 123   | 97          | 0   | 0   | 0   | 0   | 2       | 0   | 0               | 0       | GR                |
| 14  | Faroe Islands          | 14   | 10   | 13   | 0     | 0           | 0   | 0   | 0   | 0   | 0       | 1   | 0               | 0       | G                 |
| 15  | Finland                | 262  | 1289 | 311  | 61    | 393         | 12  | 22  | 3   | 10  | 6       | 0   | 1               | 4       | GH                |
| 16  | France                 | 1695 | 4214 | 738  | 948   | 3894        | 29  | 951 | 228 | 32  | 387     | 17  | 4               | 12      | GH                |
| 17  | Germany                | 6209 | 3007 | 6080 | 7210  | 13728       | 231 | 836 | 212 | 66  | 505     | 55  | 5               | 86      | GRY/B.1.1.7       |
| 18  | Gibraltar              | 33   | 40   | 68   | 493   | 128         | 0   | 0   | 0   | 0   | 0       | 0   | 0               | 0       | GV                |
| 19  | Greece                 | 17   | 21   | 97   | 0     | 4           | 5   | 1   | 6   | 15  | 0       | 0   | 0               | 0       | GR                |
| 20  | Hungary                | 54   | 181  | 117  | 0     | 21          | 1   | 32  | 0   | 0   | 0       | 0   | 0               | 0       | GH                |
| 21  | Iceland                | 510  | 176  | 616  | 2675  | 20          | 36  | 29  | 17  | 93  | 0       | 0   | 0               | 0       | GV                |
| 22  | Ireland                | 490  | 191  | 776  | 983   | 3366        | 16  | 24  | 6   | 84  | 28      | 11  | 0               | 16      | GRY/B.1.1.7       |
| 23  | Italy                  | 2744 | 677  | 1793 | 4386  | 4478        | 3   | 380 | 87  | 121 | 17      | 319 | 1               | 47      | GV                |
| 24  | Kosovo                 | 10   | 0    | 15   | 2     | 3           | 0   | 0   | 0   | 0   | 0       | 0   | 0               | 0       | GR                |
| 25  | Latvia                 | 35   | 46   | 397  | 354   | 130         | 4   | 367 | 4   | 0   | 0       | 0   | 0               | 0       | GR                |
| 26  | Liechtenstein          | 36   | 2    | 0    | 0     | 1           | 0   |     | 0   | 0   | 0       | 0   | 0               | 0       | G                 |
| 27  | Lithuania              | 189  | 14   | 398  | 1132  | 107         | 61  | 25  | 0   | 3   | 1       | 0   | 0               | 0       | GV                |
| 28  | Luxembourg             | 872  | 1333 | 277  | 689   | 32          | 5   | 0   | 8   | 7   | 2       | 0   | 0               | 0       | GH                |
| 29  | Malta                  | 4    | 10   | 0    | 0     | 0           | 0   | 1   | 0   | 0   | 0       | 0   | 0               | 0       | GH                |
| 30  | Moldova                | 5    | 0    | 3    | 0     | 0           | 0   | 0   | 0   | 1   | 0       | 0   | 0               | 0       | G                 |
| 31  | Monaco                 | 0    | 2    | 1    | 2     | 1           | 0   | 0   | 0   | 0   | 1       | 0   | 0               | 0       | GV                |

|           |                 |              |              |              |               |               |             |             |             |             |             |            |           |            |                    |
|-----------|-----------------|--------------|--------------|--------------|---------------|---------------|-------------|-------------|-------------|-------------|-------------|------------|-----------|------------|--------------------|
| <b>32</b> | Montenegro      | 9            | 2            | 13           | 0             | 7             | 0           | 0           | 0           | 0           | 0           | 0          | 0         | 0          | <b>GR</b>          |
| <b>33</b> | Netherlands     | 4127         | 2113         | 1160         | 3975          | 3648          | 309         | 90          | 40          | 89          | 237         | 13         | 3         | 18         | <b>G</b>           |
| <b>34</b> | North Macedonia | 80           | 15           | 235          | 12            | 53            | 0           | 0           | 0           | 0           | 0           | 0          | 1         | 0          | <b>GR</b>          |
| <b>35</b> | Norway          | 477          | 759          | 1350         | 579           | 1174          | 2           | 117         | 2           | 11          | 154         | 1          | 1         | 18         | <b>GR</b>          |
| <b>36</b> | Poland          | 603          | 90           | 568          | 92            | 824           | 1           | 6           | 1           | 16          | 4           | 0          | 0         | 0          | <b>GRY/B.1.1.7</b> |
| <b>37</b> | Portugal        | 717          | 387          | 1181         | 1104          | 755           | 18          | 19          | 51          | 86          | 12          | 11         | 0         | 0          | <b>GR</b>          |
| <b>38</b> | Romania         | 190          | 32           | 53           | 16            | 112           | 0           | 3           | 0           | 0           | 0           | 2          | 0         | 0          | <b>G</b>           |
| <b>39</b> | Russia          | 105          | 49           | 1898         | 1             | 4             | 2           | 33          | 2           | 1           | 3           | 0          | 0         | 0          | <b>GR</b>          |
| <b>40</b> | Serbia          | 23           | 23           | 168          | 4             | 2             | 0           | 1           | 0           | 0           | 0           | 0          | 0         | 0          | <b>GR</b>          |
| <b>41</b> | Slovakia        | 119          | 41           | 46           | 6             | 287           | 1           | 2           | 0           | 0           | 6           | 0          | 0         | 0          | <b>GRY/B.1.1.7</b> |
| <b>42</b> | Slovenia        | 3233         | 161          | 254          | 44            | 396           | 0           | 4           | 23          | 23          | 20          | 1          | 0         | 14         | <b>G</b>           |
| <b>43</b> | Spain           | 3053         | 566          | 1157         | 4591          | 2916          | 20          | 564         | 1400        | 135         | 22          | 6          | 2         | 7          | <b>GV</b>          |
| <b>44</b> | Sweden          | 1895         | 1130         | 929          | 2994          | 2078          | 29          | 381         | 12          | 1           | 172         | 11         | 2         | 1          | <b>GV</b>          |
| <b>45</b> | Switzerland     | 4549         | 5333         | 3200         | 4524          | 3169          | 13          | 364         | 26          | 32          | 102         | 22         | 4         | 5          | <b>GH</b>          |
| <b>46</b> | Turkey          | 569          | 486          | 1068         | 31            | 506           | 3           | 261         | 28          | 0           | 95          | 5          | 2         | 12         | <b>GR</b>          |
| <b>47</b> | Ukraine         | 42           | 0            | 75           | 3             | 22            | 0           | 1           | 0           | 1           | 0           | 0          | 0         | 0          | <b>GR</b>          |
| <b>48</b> | United Kingdom  | 19251        | 11453        | 50519        | 78101         | 153079        | 2574        | 2503        | 656         | 4230        | 316         | 22         | 15        | 210        | <b>GRY/B.1.1.7</b> |
|           |                 |              |              |              |               |               |             |             |             |             |             |            |           |            |                    |
|           | <b>Total</b>    | <b>65836</b> | <b>43340</b> | <b>85301</b> | <b>137937</b> | <b>204407</b> | <b>3530</b> | <b>7769</b> | <b>2973</b> | <b>5154</b> | <b>2702</b> | <b>584</b> | <b>69</b> | <b>585</b> | <b>560187</b>      |

| No. | Oceania                  | G           | GH          | GR           | GV        | GRY/B.1.1.7 | L         | O          | S          | V          | B.1.351   | P.1      | B.1.429+B.1.427 | B.1.525  | Predominant clade |
|-----|--------------------------|-------------|-------------|--------------|-----------|-------------|-----------|------------|------------|------------|-----------|----------|-----------------|----------|-------------------|
| 1   | Australia                | 954         | 1407        | 13516        | 40        | 177         | 46        | 416        | 838        | 253        | 32        | 2        | 16              | 6        | GR                |
| 2   | Guam                     | 9           | 8           | 2            | 0         | 0           | 0         | 4          | 0          | 0          | 0         | 0        | 7               | 0        | G                 |
| 3   | New Zealand              | 240         | 263         | 375          | 36        | 82          | 25        | 33         | 53         | 77         | 20        | 3        | 4               | 0        | GR                |
| 4   | Papua New Guinea         | 0           | 7           | 0            | 0         | 0           | 0         | 59         | 0          | 0          | 0         | 0        | 0               | 0        | GH                |
| 5   | Northern Mariana Islands | 20          | 22          | 8            | 1         | 0           | 0         | 0          | 1          | 0          | 0         | 0        | 1               | 0        | O                 |
|     | <b>Total</b>             | <b>1223</b> | <b>1707</b> | <b>13901</b> | <b>77</b> | <b>259</b>  | <b>71</b> | <b>512</b> | <b>892</b> | <b>330</b> | <b>52</b> | <b>5</b> | <b>28</b>       | <b>6</b> | <b>19063</b>      |

**Supplementary Table 3:** Frequency distribution of different clades of SARS-CoV-2 among countries of six different continents

| Asia         | G           | GH          | GR           | GV         | GRY/B.1.1.7 | L           | O           | S           | V          | B.1.351    | P.1      | B.1.429+B.1.427 | B.1.525   | Total        |
|--------------|-------------|-------------|--------------|------------|-------------|-------------|-------------|-------------|------------|------------|----------|-----------------|-----------|--------------|
| Dec, 2019    | 0           | 0           | 0            | 0          | 0           | 21          | 2           | 1           | 0          | 0          | 0        | 0               | 0         | 24           |
| Jan, 2020    | 5           | 1           | 1            | 0          | 0           | 254         | 123         | 190         | 2          | 0          | 0        | 0               | 0         | 576          |
| Feb, 2020    | 5           | 17          | 4            | 0          | 0           | 288         | 404         | 207         | 116        | 0          | 0        | 0               | 0         | 1041         |
| Mar, 2020    | 317         | 481         | 619          | 0          | 0           | 342         | 696         | 492         | 139        | 0          | 0        | 0               | 0         | 3086         |
| Apr, 2020    | 333         | 486         | 2927         | 1          | 0           | 75          | 1013        | 85          | 24         | 0          | 0        | 0               | 0         | 4944         |
| May, 2020    | 481         | 456         | 1772         | 0          | 0           | 30          | 786         | 278         | 1          | 0          | 0        | 0               | 0         | 3804         |
| Jun, 2020    | 320         | 828         | 1456         | 0          | 0           | 16          | 374         | 68          | 1          | 0          | 0        | 0               | 0         | 3063         |
| Jul, 2020    | 314         | 428         | 3442         | 0          | 0           | 10          | 154         | 10          | 1          | 0          | 0        | 0               | 0         | 4359         |
| Aug, 2020    | 182         | 537         | 4343         | 2          | 0           | 3           | 102         | 5           | 0          | 0          | 0        | 0               | 0         | 5174         |
| Sep, 2020    | 127         | 400         | 1762         | 13         | 0           | 0           | 35          | 3           | 0          | 0          | 0        | 0               | 0         | 2340         |
| Oct, 2020    | 105         | 438         | 1788         | 40         | 0           | 0           | 20          | 1           | 0          | 0          | 0        | 0               | 0         | 2392         |
| Nov, 2020    | 145         | 827         | 3024         | 22         | 2           | 0           | 48          | 8           | 0          | 0          | 0        | 0               | 0         | 4076         |
| Dec, 2020    | 308         | 1144        | 4250         | 69         | 243         | 0           | 20          | 14          | 0          | 13         | 0        | 16              | 0         | 6077         |
| Jan, 2021    | 298         | 911         | 2756         | 54         | 723         | 0           | 48          | 8           | 0          | 31         | 7        | 42              | 11        | 4889         |
| Feb, 2021    | 183         | 615         | 350          | 18         | 648         | 0           | 39          | 7           | 0          | 43         | 2        | 22              | 6         | 1933         |
| Mar, 2021    | 32          | 112         | 50           | 0          | 14          | 0           | 7           | 0           | 0          | 17         | 0        | 0               | 2         | 234          |
| <b>Total</b> | <b>3155</b> | <b>7681</b> | <b>28544</b> | <b>219</b> | <b>1630</b> | <b>1039</b> | <b>3871</b> | <b>1377</b> | <b>284</b> | <b>104</b> | <b>9</b> | <b>80</b>       | <b>19</b> | <b>48012</b> |

| <b>Africa</b> | <b>G</b>    | <b>GH</b>  | <b>GR</b>   | <b>GV</b> | <b>GRY/B.1.1.7</b> | <b>L</b>  | <b>O</b>   | <b>S</b>   | <b>V</b>  | <b>B.1.351</b> | <b>P.1</b> | <b>B.1.429+B.1.427</b> | <b>B.1.525</b> | <b>Total</b> |
|---------------|-------------|------------|-------------|-----------|--------------------|-----------|------------|------------|-----------|----------------|------------|------------------------|----------------|--------------|
| Dec, 2019     | 0           | 0          | 0           | 0         | 0                  | 0         | 0          | 0          | 0         | 0              | 0          | 0                      | 0              | 0            |
| Jan, 2020     | 0           | 0          | 0           | 0         | 0                  | 0         | 0          | 0          | 0         | 0              | 0          | 0                      | 0              | 0            |
| Feb, 2020     | 1           | 1          | 1           | 0         | 0                  | 0         | 0          | 0          | 1         | 0              | 0          | 0                      | 0              | 4            |
| Mar, 2020     | 108         | 64         | 48          | 3         | 0                  | 4         | 52         | 42         | 15        | 0              | 0          | 0                      | 0              | 336          |
| Apr, 2020     | 358         | 78         | 122         | 0         | 0                  | 2         | 32         | 37         | 3         | 0              | 0          | 0                      | 0              | 632          |
| May, 2020     | 408         | 81         | 234         | 0         | 0                  | 0         | 13         | 42         | 3         | 0              | 0          | 0                      | 0              | 781          |
| Jun, 2020     | 297         | 79         | 433         | 0         | 0                  | 5         | 26         | 33         | 0         | 0              | 0          | 0                      | 0              | 873          |
| Jul, 2020     | 386         | 59         | 965         | 1         | 0                  | 10        | 16         | 26         | 0         | 0              | 0          | 0                      | 0              | 1463         |
| Aug, 2020     | 258         | 92         | 347         | 0         | 0                  | 1         | 9          | 55         | 0         | 0              | 0          | 0                      | 0              | 762          |
| Sep, 2020     | 109         | 27         | 277         | 7         | 0                  | 0         | 2          | 52         | 0         | 0              | 0          | 0                      | 0              | 474          |
| Oct, 2020     | 158         | 32         | 270         | 7         | 0                  | 0         | 1          | 12         | 0         | 40             | 0          | 0                      | 0              | 520          |
| Nov, 2020     | 147         | 74         | 206         | 10        | 0                  | 0         | 8          | 2          | 0         | 291            | 0          | 0                      | 0              | 738          |
| Dec, 2020     | 157         | 96         | 225         | 9         | 12                 | 2         | 28         | 85         | 0         | 740            | 0          | 0                      | 6              | 1360         |
| Jan, 2021     | 268         | 312        | 217         | 30        | 224                | 20        | 47         | 82         | 0         | 1001           | 0          | 0                      | 58             | 2259         |
| Feb, 2021     | 59          | 0          | 32          | 1         | 22                 | 2         | 11         | 22         | 0         | 143            | 0          | 0                      | 36             | 328          |
| Mar, 2021     | 2           | 0          | 0           | 0         | 0                  | 0         | 2          | 0          | 0         | 7              | 0          | 0                      | 16             | 27           |
| <b>Total</b>  | <b>2716</b> | <b>995</b> | <b>3377</b> | <b>68</b> | <b>258</b>         | <b>46</b> | <b>247</b> | <b>490</b> | <b>22</b> | <b>2222</b>    | <b>0</b>   | <b>0</b>               | <b>116</b>     | <b>10557</b> |

| North America | G            | GH            | GR           | GV         | GRY/B.1.1.7 | L          | O           | S           | V          | B.1.351    | P.1        | B.1.429+B.1.427 | B.1.525    | Total         |
|---------------|--------------|---------------|--------------|------------|-------------|------------|-------------|-------------|------------|------------|------------|-----------------|------------|---------------|
| Dec, 2019     | 0            | 0             | 0            | 0          | 0           | 0          | 0           | 0           | 0          | 0          | 0          | 0               | 0          | 0             |
| Jan, 2020     | 1            | 0             | 0            | 0          | 0           | 8          | 3           | 7           | 0          | 0          | 0          | 0               | 0          | 19            |
| Feb, 2020     | 1            | 6             | 9            | 0          | 0           | 14         | 38          | 68          | 4          | 0          | 0          | 0               | 0          | 140           |
| Mar, 2020     | 1828         | 8473          | 1108         | 0          | 0           | 354        | 308         | 2756        | 402        | 0          | 0          | 1               | 0          | 15230         |
| Apr, 2020     | 2401         | 7729          | 1473         | 0          | 0           | 268        | 125         | 1093        | 126        | 0          | 0          | 0               | 0          | 13216         |
| May, 2020     | 1704         | 5638          | 1468         | 2          | 4           | 31         | 81          | 287         | 7          | 0          | 0          | 0               | 0          | 9222          |
| Jun, 2020     | 2872         | 4798          | 1593         | 1          | 0           | 5          | 41          | 125         | 0          | 0          | 0          | 0               | 0          | 9435          |
| Jul, 2020     | 2724         | 3180          | 2197         | 1          | 0           | 0          | 128         | 19          | 0          | 0          | 0          | 4               | 0          | 8254          |
| Aug, 2020     | 2865         | 3632          | 1756         | 6          | 0           | 3          | 53          | 11          | 1          | 0          | 0          | 0               | 0          | 8327          |
| Sep, 2020     | 2246         | 3246          | 1602         | 10         | 0           | 1          | 67          | 2           | 0          | 0          | 0          | 8               | 0          | 7182          |
| Oct, 2020     | 3435         | 4745          | 2095         | 28         | 0           | 0          | 27          | 4           | 0          | 0          | 0          | 8               | 0          | 10342         |
| Nov, 2020     | 4510         | 9593          | 2565         | 15         | 2           | 5          | 96          | 11          | 0          | 0          | 0          | 267             | 0          | 17064         |
| Dec, 2020     | 5320         | 14757         | 2604         | 35         | 115         | 2          | 297         | 16          | 0          | 1          | 0          | 1306            | 1          | 24454         |
| Jan, 2021     | 5845         | 21536         | 2849         | 101        | 1216        | 3          | 376         | 111         | 0          | 26         | 12         | 5761            | 30         | 37866         |
| Feb, 2021     | 6021         | 30764         | 6178         | 56         | 4393        | 0          | 222         | 118         | 0          | 108        | 42         | 7364            | 50         | 55315         |
| Mar, 2021     | 1873         | 10018         | 2767         | 4          | 1896        | 0          | 220         | 51          | 0          | 48         | 48         | 2425            | 42         | 19392         |
| <b>Total</b>  | <b>43647</b> | <b>128115</b> | <b>30264</b> | <b>259</b> | <b>7626</b> | <b>694</b> | <b>2082</b> | <b>4679</b> | <b>540</b> | <b>183</b> | <b>102</b> | <b>17144</b>    | <b>123</b> | <b>235458</b> |

| South America | G           | GH          | GR          | GV        | GRY/B.1.1.7 | L         | O          | S         | V         | B.1.351  | P.1        | B.1.429+B.1.427 | B.1.525  | Total       |
|---------------|-------------|-------------|-------------|-----------|-------------|-----------|------------|-----------|-----------|----------|------------|-----------------|----------|-------------|
| Dec, 2019     | 0           | 0           | 0           | 0         | 0           | 0         | 0          | 0         | 0         | 0        | 0          | 0               | 0        | 0           |
| Jan, 2020     | 0           | 0           | 0           | 0         | 0           | 0         | 0          | 0         | 0         | 0        | 0          | 0               | 0        | 0           |
| Feb, 2020     | 3           | 0           | 3           | 0         | 0           | 0         | 0          | 0         | 2         | 0        | 0          | 0               | 0        | 8           |
| Mar, 2020     | 137         | 172         | 538         | 0         | 0           | 15        | 52         | 62        | 22        | 0        | 0          | 0               | 0        | 998         |
| Apr, 2020     | 152         | 163         | 846         | 0         | 0           | 3         | 9          | 5         | 8         | 0        | 0          | 0               | 0        | 1186        |
| May, 2020     | 70          | 177         | 744         | 0         | 0           | 0         | 7          | 0         | 3         | 0        | 0          | 0               | 0        | 1001        |
| Jun, 2020     | 54          | 72          | 483         | 0         | 0           | 1         | 5          | 1         | 0         | 0        | 0          | 0               | 0        | 616         |
| Jul, 2020     | 38          | 95          | 489         | 0         | 0           | 0         | 12         | 1         | 0         | 0        | 0          | 0               | 0        | 635         |
| Aug, 2020     | 38          | 135         | 423         | 0         | 0           | 0         | 0          | 22        | 0         | 0        | 0          | 0               | 0        | 618         |
| Sep, 2020     | 7           | 35          | 334         | 0         | 0           | 0         | 30         | 0         | 0         | 0        | 0          | 0               | 0        | 406         |
| Oct, 2020     | 13          | 58          | 385         | 1         | 0           | 0         | 45         | 0         | 0         | 0        | 0          | 0               | 0        | 502         |
| Nov, 2020     | 16          | 33          | 457         | 0         | 0           | 1         | 3          | 0         | 0         | 0        | 0          | 0               | 0        | 510         |
| Dec, 2020     | 132         | 73          | 483         | 2         | 11          | 0         | 1          | 1         | 0         | 0        | 89         | 1               | 0        | 793         |
| Jan, 2021     | 92          | 123         | 483         | 17        | 52          | 0         | 3          | 0         | 0         | 0        | 248        | 4               | 0        | 1022        |
| Feb, 2021     | 113         | 70          | 363         | 15        | 102         | 0         | 1          | 1         | 0         | 2        | 142        | 12              | 0        | 821         |
| Mar, 2021     | 146         | 22          | 56          | 0         | 98          | 0         | 1          | 0         | 0         | 0        | 17         | 7               | 0        | 347         |
| <b>Total</b>  | <b>1011</b> | <b>1228</b> | <b>6087</b> | <b>35</b> | <b>263</b>  | <b>20</b> | <b>169</b> | <b>93</b> | <b>35</b> | <b>2</b> | <b>496</b> | <b>24</b>       | <b>0</b> | <b>9463</b> |

| Europe       | G            | GH           | GR           | GV            | GRY/B.1.1.7   | L           | O           | S           | V           | B.1.351     | P.1        | B.1.429+B.1.427 | B.1.525    | Total         |
|--------------|--------------|--------------|--------------|---------------|---------------|-------------|-------------|-------------|-------------|-------------|------------|-----------------|------------|---------------|
| Dec, 2019    | 0            | 0            | 0            | 0             | 0             | 0           | 1           | 0           | 0           | 0           | 0          | 0               | 0          | 1             |
| Jan, 2020    | 9            | 3            | 5            | 6             | 0             | 4           | 13          | 3           | 3           | 0           | 0          | 0               | 0          | 46            |
| Feb, 2020    | 183          | 27           | 88           | 3             | 1             | 39          | 61          | 16          | 117         | 0           | 0          | 0               | 0          | 535           |
| Mar, 2020    | 9246         | 4089         | 7414         | 7             | 0             | 2275        | 710         | 1547        | 3294        | 0           | 0          | 0               | 0          | 28582         |
| Apr, 2020    | 9220         | 2932         | 9914         | 4             | 0             | 1020        | 536         | 483         | 1522        | 0           | 0          | 0               | 0          | 25631         |
| May, 2020    | 2740         | 1287         | 5418         | 5             | 0             | 102         | 131         | 85          | 121         | 0           | 0          | 0               | 0          | 9889          |
| Jun, 2020    | 1440         | 761          | 5328         | 99            | 0             | 29          | 63          | 35          | 59          | 0           | 0          | 0               | 0          | 7814          |
| Jul, 2020    | 714          | 443          | 4059         | 176           | 0             | 13          | 46          | 55          | 21          | 0           | 0          | 0               | 0          | 5527          |
| Aug, 2020    | 1768         | 2118         | 6885         | 2171          | 0             | 6           | 108         | 11          | 8           | 0           | 0          | 0               | 0          | 13075         |
| Sep, 2020    | 2952         | 3042         | 7509         | 9740          | 6             | 3           | 273         | 4           | 5           | 0           | 0          | 0               | 0          | 23534         |
| Oct, 2020    | 2120         | 4130         | 7958         | 23031         | 63            | 3           | 433         | 5           | 1           | 0           | 0          | 0               | 0          | 37744         |
| Nov, 2020    | 5992         | 6015         | 9071         | 27141         | 1974          | 2           | 80          | 10          | 0           | 1           | 0          | 0               | 0          | 50286         |
| Dec, 2020    | 8101         | 4653         | 5170         | 32522         | 15779         | 1           | 205         | 82          | 3           | 68          | 0          | 3               | 3          | 66590         |
| Jan, 2021    | 9319         | 7946         | 5794         | 26510         | 57207         | 15          | 721         | 226         | 0           | 542         | 27         | 24              | 82         | 108413        |
| Feb, 2021    | 8233         | 4831         | 6919         | 13635         | 74398         | 15          | 2292        | 309         | 0           | 1266        | 310        | 30              | 272        | 112510        |
| Mar, 2021    | 3799         | 1063         | 3769         | 2887          | 54979         | 3           | 2096        | 102         | 0           | 825         | 247        | 12              | 228        | 70010         |
| <b>Total</b> | <b>65836</b> | <b>43340</b> | <b>85301</b> | <b>137937</b> | <b>204407</b> | <b>3530</b> | <b>7769</b> | <b>2973</b> | <b>5154</b> | <b>2702</b> | <b>584</b> | <b>69</b>       | <b>585</b> | <b>560187</b> |



| Oceania      | G           | GH          | GR           | GV        | GRY/B.1.1.7 | L         | O          | S          | V          | B.1.351   | P.1      | B.1.429+B.1.427 | B.1.525  | Total        |
|--------------|-------------|-------------|--------------|-----------|-------------|-----------|------------|------------|------------|-----------|----------|-----------------|----------|--------------|
| Dec, 2019    | 0           | 0           | 0            | 0         | 0           | 0         | 0          | 0          | 0          | 0         | 0        | 0               | 0        | 0            |
| Jan, 2020    | 1           | 0           | 0            | 0         | 0           | 1         | 14         | 5          | 0          | 0         | 0        | 0               | 0        | 21           |
| Feb, 2020    | 0           | 0           | 0            | 0         | 0           | 2         | 13         | 4          | 0          | 0         | 0        | 0               | 0        | 19           |
| Mar, 2020    | 526         | 484         | 364          | 2         | 0           | 60        | 262        | 597        | 292        | 0         | 0        | 0               | 0        | 2587         |
| Apr, 2020    | 344         | 231         | 148          | 0         | 0           | 6         | 101        | 257        | 38         | 0         | 0        | 0               | 0        | 1125         |
| May, 2020    | 24          | 178         | 41           | 0         | 0           | 0         | 30         | 7          | 0          | 0         | 0        | 0               | 0        | 280          |
| Jun, 2020    | 13          | 61          | 507          | 0         | 0           | 0         | 8          | 4          | 0          | 0         | 0        | 0               | 0        | 593          |
| Jul, 2020    | 123         | 47          | 6414         | 0         | 0           | 0         | 9          | 1          | 0          | 0         | 0        | 0               | 0        | 6594         |
| Aug, 2020    | 34          | 24          | 4942         | 2         | 0           | 0         | 5          | 2          | 0          | 0         | 0        | 0               | 0        | 5009         |
| Sep, 2020    | 24          | 34          | 1063         | 2         | 0           | 2         | 7          | 2          | 0          | 0         | 0        | 0               | 0        | 1134         |
| Oct, 2020    | 47          | 62          | 248          | 24        | 0           | 0         | 6          | 0          | 0          | 0         | 0        | 0               | 0        | 387          |
| Nov, 2020    | 25          | 98          | 39           | 21        | 1           | 0         | 2          | 0          | 0          | 0         | 0        | 0               | 0        | 186          |
| Dec, 2020    | 30          | 210         | 44           | 16        | 26          | 0         | 40         | 4          | 0          | 8         | 0        | 9               | 0        | 387          |
| Jan, 2021    | 24          | 100         | 47           | 9         | 94          | 0         | 6          | 4          | 0          | 26        | 0        | 14              | 2        | 326          |
| Feb, 2021    | 2           | 106         | 18           | 0         | 62          | 0         | 2          | 1          | 0          | 6         | 0        | 5               | 2        | 204          |
| Mar, 2021    | 6           | 72          | 26           | 1         | 76          | 0         | 7          | 4          | 0          | 12        | 5        | 0               | 2        | 211          |
| <b>Total</b> | <b>1223</b> | <b>1707</b> | <b>13901</b> | <b>77</b> | <b>259</b>  | <b>71</b> | <b>512</b> | <b>892</b> | <b>330</b> | <b>52</b> | <b>5</b> | <b>28</b>       | <b>6</b> | <b>19063</b> |

**Supplementary Table 4:** Temporal distribution of different clades of SARS-CoV-2 in six different continents

| No. | Country Name                    | Continent     | Total confirmed cases | Total confirmed deaths | CFR  |
|-----|---------------------------------|---------------|-----------------------|------------------------|------|
| 1   | Mexico                          | North America | 2226550               | 201623                 | 9.06 |
| 2   | Egypt                           | Africa        | 200739                | 11914                  | 5.94 |
| 3   | Ecuador                         | South America | 325124                | 16746                  | 5.15 |
| 4   | China                           | Asia          | 102715                | 4851                   | 4.72 |
| 5   | Bolivia                         | South America | 269628                | 12186                  | 4.52 |
| 6   | Afghanistan                     | Asia          | 56384                 | 2476                   | 4.39 |
| 7   | Zimbabwe                        | Africa        | 36839                 | 1520                   | 4.13 |
| 8   | Union of the Comoros            | Africa        | 3696                  | 146                    | 3.95 |
| 9   | Bosnia and Herzegovina          | Europe        | 165787                | 6427                   | 3.88 |
| 10  | Bulgaria                        | Europe        | 333250                | 12913                  | 3.87 |
| 11  | Mali                            | Africa        | 9921                  | 384                    | 3.87 |
| 12  | Eswatini                        | Africa        | 17326                 | 667                    | 3.85 |
| 13  | Guatemala                       | North America | 193556                | 6809                   | 3.52 |
| 14  | Guatemala                       | South America | 193556                | 6809                   | 3.52 |
| 15  | Tunisia                         | Africa        | 251169                | 8760                   | 3.49 |
| 16  | South Africa                    | Africa        | 1545979               | 52710                  | 3.41 |
| 17  | Peru                            | South America | 1529882               | 51469                  | 3.36 |
| 18  | Iran                            | Asia          | 1864984               | 62478                  | 3.35 |
| 19  | Hungary                         | Europe        | 645733                | 20435                  | 3.16 |
| 20  | El Salvador                     | North America | 64431                 | 2003                   | 3.11 |
| 21  | Greece                          | Europe        | 255755                | 7945                   | 3.11 |
| 22  | Australia                       | Oceania       | 29278                 | 909                    | 3.10 |
| 23  | Italy                           | Europe        | 3544957               | 108350                 | 3.06 |
| 24  | Gambia                          | Africa        | 5420                  | 164                    | 3.03 |
| 25  | Lesotho                         | Africa        | 10686                 | 315                    | 2.95 |
| 26  | North Macedonia                 | Europe        | 127240                | 3716                   | 2.92 |
| 27  | United Kingdom                  | Europe        | 4341736               | 126670                 | 2.92 |
| 28  | Germany                         | Europe        | 2791822               | 76093                  | 2.73 |
| 29  | Senegal                         | Africa        | 38566                 | 1044                   | 2.71 |
| 30  | Indonesia                       | Asia          | 1501093               | 40581                  | 2.70 |
| 31  | Slovakia                        | Europe        | 359330                | 9624                   | 2.68 |
| 32  | Colombia                        | South America | 2382730               | 62955                  | 2.64 |
| 33  | Democratic Republic of the Cong | Africa        | 28011                 | 739                    | 2.64 |
| 34  | Algeria                         | Africa        | 116946                | 3084                   | 2.64 |
| 35  | Belgium                         | Europe        | 872936                | 22921                  | 2.63 |
| 36  | Republic of the Congo           | Africa        | 27794                 | 726                    | 2.61 |
| 37  | Belize                          | North America | 12411                 | 317                    | 2.55 |
| 38  | Brazil                          | South America | 12534688              | 312206                 | 2.49 |
| 39  | Romania                         | Europe        | 940443                | 23234                  | 2.47 |
| 40  | Antigua and Barbuda             | North America | 1136                  | 28                     | 2.46 |
| 41  | Argentina                       | South America | 2308597               | 55449                  | 2.40 |
| 42  | Canada                          | North America | 965404                | 22880                  | 2.37 |
| 43  | Chile                           | South America | 984484                | 23070                  | 2.34 |
| 44  | Spain                           | Europe        | 3270825               | 75199                  | 2.30 |
| 45  | Poland                          | Europe        | 2288826               | 52392                  | 2.29 |
| 46  | Myanmar                         | Asia          | 142393                | 3206                   | 2.25 |
| 47  | Croatia                         | Europe        | 269009                | 5928                   | 2.20 |

|    |                   |               |          |        |      |
|----|-------------------|---------------|----------|--------|------|
| 48 | Gibraltar         | Europe        | 4273     | 94     | 2.20 |
| 49 | Russia            | Europe        | 4536820  | 98442  | 2.17 |
| 50 | Pakistan          | Asia          | 659116   | 14256  | 2.16 |
| 51 | Moldova           | Europe        | 228370   | 4915   | 2.15 |
| 52 | France            | Europe        | 4481165  | 94402  | 2.11 |
| 53 | Kosovo            | Europe        | 88712    | 1834   | 2.07 |
| 54 | Portugal          | Europe        | 820716   | 16843  | 2.05 |
| 55 | Slovenia          | Europe        | 212965   | 4311   | 2.02 |
| 56 | Sierra Leone      | Africa        | 3970     | 79     | 1.99 |
| 57 | Ireland           | Europe        | 235078   | 4667   | 1.99 |
| 58 | Liechtenstein     | Europe        | 2747     | 54     | 1.97 |
| 59 | Ukraine           | Europe        | 1662942  | 32418  | 1.95 |
| 60 | Paraguay          | South America | 208655   | 4063   | 1.95 |
| 61 | Suriname          | South America | 9097     | 177    | 1.95 |
| 62 | Japan             | Asia          | 470175   | 9086   | 1.93 |
| 63 | Latvia            | Europe        | 101207   | 1883   | 1.86 |
| 64 | Armenia           | Asia          | 191491   | 3497   | 1.83 |
| 65 | USA               | North America | 29968464 | 544430 | 1.82 |
| 66 | Philippines       | Asia          | 731894   | 13186  | 1.80 |
| 67 | Hong Kong         | Asia          | 11,454   | 205    | 1.79 |
| 68 | Albania           | Europe        | 124419   | 2216   | 1.78 |
| 69 | Trinidad          | South America | 7977     | 142    | 1.78 |
| 70 | Morocco           | Africa        | 494756   | 8807   | 1.78 |
| 71 | Guam              | Oceania       | 7594     | 134    | 1.76 |
| 72 | Panama            | North America | 353839   | 6100   | 1.72 |
| 73 | Czech Republic    | Europe        | 1523668  | 26222  | 1.72 |
| 74 | Sweden            | Europe        | 780018   | 13402  | 1.72 |
| 75 | Saudi Arabia      | Asia          | 388866   | 6656   | 1.71 |
| 76 | Iraq              | Asia          | 838265   | 14249  | 1.70 |
| 77 | Libya             | Africa        | 157545   | 2653   | 1.68 |
| 78 | Austria           | Europe        | 536751   | 9030   | 1.68 |
| 79 | South Korea       | Asia          | 103000   | 1729   | 1.68 |
| 80 | Lithuania         | Europe        | 215216   | 3566   | 1.66 |
| 81 | Madagascar        | Africa        | 23969    | 394    | 1.64 |
| 82 | Kenya             | Africa        | 131116   | 2135   | 1.63 |
| 83 | Switzerland       | Europe        | 594043   | 9589   | 1.61 |
| 84 | Jamaica           | North America | 38514    | 586    | 1.52 |
| 85 | Cameroon          | Africa        | 47669    | 721    | 1.51 |
| 86 | Guadeloupe        | North America | 11512    | 173    | 1.50 |
| 87 | Bangladesh        | Asia          | 600895   | 8949   | 1.49 |
| 88 | Equatorial Guinea | Africa        | 6914     | 102    | 1.48 |
| 89 | Brunei            | Asia          | 207      | 3      | 1.45 |
| 90 | Rwanda            | Africa        | 21490    | 305    | 1.42 |
| 91 | Ethiopia          | Africa        | 202545   | 2825   | 1.39 |
| 92 | Saint Lucia       | North America | 4202     | 58     | 1.38 |
| 93 | Montenegro        | Europe        | 90416    | 1245   | 1.38 |
| 94 | Azerbaijan        | Europe        | 257330   | 3513   | 1.37 |
| 95 | Zambia            | Africa        | 88012    | 1200   | 1.36 |
| 96 | Costa Rica        | North America | 215178   | 2931   | 1.36 |

|     |                          |               |          |        |      |
|-----|--------------------------|---------------|----------|--------|------|
| 97  | Vietnam                  | Asia          | 2594     | 35     | 1.35 |
| 98  | Georgia                  | Asia          | 281145   | 3773   | 1.34 |
| 99  | Malta                    | Europe        | 28938    | 388    | 1.34 |
| 100 | India                    | Asia          | 12095855 | 162114 | 1.34 |
| 101 | Lebanon                  | Asia          | 462339   | 6136   | 1.33 |
| 102 | Botswana                 | Africa        | 38466    | 506    | 1.32 |
| 103 | Dominican Republic       | North America | 252182   | 3307   | 1.31 |
| 104 | Netherlands              | Europe        | 1259155  | 16475  | 1.31 |
| 105 | Benin                    | Africa        | 7100     | 90     | 1.27 |
| 106 | Nigeria                  | Africa        | 162641   | 2049   | 1.26 |
| 107 | Kazakhstan               | Asia          | 293761   | 3696   | 1.26 |
| 108 | Northern Mariana Islands | Oceania       | 159      | 2      | 1.26 |
| 109 | Monaco                   | Europe        | 2265     | 28     | 1.24 |
| 110 | New Zealand              | Oceania       | 2139     | 26     | 1.22 |
| 111 | Luxembourg               | Europe        | 61073    | 741    | 1.21 |
| 112 | Namibia                  | Africa        | 43923    | 513    | 1.17 |
| 113 | Bermuda                  | North America | 1028     | 12     | 1.17 |
| 114 | Mozambique               | Africa        | 67292    | 769    | 1.14 |
| 115 | Burkina Faso             | Africa        | 12702    | 145    | 1.14 |
| 116 | Barbados                 | North America | 3629     | 41     | 1.13 |
| 117 | Jordan                   | Asia          | 597256   | 6651   | 1.11 |
| 118 | Nepal                    | Asia          | 276980   | 3027   | 1.09 |
| 119 | Palestine                | Asia          | 240000   | 2614   | 1.09 |
| 120 | Finland                  | Europe        | 76425    | 822    | 1.08 |
| 121 | Togo                     | Africa        | 9992     | 107    | 1.07 |
| 122 | Oman                     | Asia          | 156883   | 1662   | 1.06 |
| 123 | Denmark                  | Europe        | 228692   | 2415   | 1.06 |
| 124 | Mauritius                | Africa        | 963      | 10     | 1.04 |
| 125 | Venezuela                | South America | 156655   | 1565   | 1.00 |
| 126 | Papua New Guinea         | Oceania       | 5620     | 56     | 1.00 |
| 127 | Taiwan                   | Asia          | 1023     | 10     | 0.98 |
| 128 | Andorra                  | Europe        | 11888    | 115    | 0.97 |
| 129 | Turkey                   | Europe        | 3240577  | 31230  | 0.96 |
| 130 | Uruguay                  | South America | 97406    | 915    | 0.94 |
| 131 | Serbia                   | Europe        | 590018   | 5231   | 0.89 |
| 132 | Aruba                    | South America | 9259     | 82     | 0.89 |
| 133 | Estonia                  | Europe        | 105416   | 896    | 0.85 |
| 134 | Uganda                   | Africa        | 40820    | 335    | 0.82 |
| 135 | Ghana                    | Africa        | 90287    | 740    | 0.82 |
| 136 | Mayotte                  | Africa        | 19306    | 154    | 0.80 |
| 137 | Bonaire                  | South America | 1299     | 10     | 0.77 |
| 138 | Uzbekistan               | Asia          | 82682    | 628    | 0.76 |
| 139 | Israel                   | Asia          | 831084   | 6165   | 0.74 |
| 140 | Saint Martin             | North America | 1657     | 12     | 0.72 |
| 141 | Norway                   | Europe        | 93145    | 660    | 0.71 |
| 142 | Belarus                  | Europe        | 319599   | 2227   | 0.70 |
| 143 | Reunion                  | Africa        | 15561    | 102    | 0.66 |
| 144 | Martinique               | Africa        | 7679     | 50     | 0.65 |
| 145 | British Virgin Islands   | North America | 154      | 1      | 0.65 |

|            |                                |                |                  |                |             |
|------------|--------------------------------|----------------|------------------|----------------|-------------|
| <b>146</b> | Guinea                         | Africa         | 19773            | 123            | 0.62        |
| <b>147</b> | Sri Lanka                      | Asia           | 92303            | 566            | 0.61        |
| <b>148</b> | Gabon                          | Africa         | 19140            | 114            | 0.60        |
| <b>149</b> | Saint Vincent and the Grenadin | North America  | 1739             | 10             | 0.58        |
| <b>150</b> | Cuba                           | North America  | 73204            | 417            | 0.57        |
| <b>151</b> | Kuwait                         | Asia           | 229550           | 1298           | 0.57        |
| <b>152</b> | Cyprus                         | Europe         | 44991            | 254            | 0.56        |
| <b>153</b> | Cote d'Ivoire                  | Africa         | 43422            | 239            | 0.55        |
| <b>154</b> | French Guiana                  | South America  | 16922            | 89             | 0.53        |
| <b>155</b> | Iceland                        | Europe         | 6183             | 29             | 0.47        |
| <b>156</b> | Cambodia                       | Asia           | 2378             | 11             | 0.46        |
| <b>157</b> | Cayman Islands                 | North America  | 487              | 2              | 0.41        |
| <b>158</b> | Curacao                        | South America  | 7558             | 30             | 0.40        |
| <b>159</b> | Malaysia                       | Asia           | 342885           | 1260           | 0.37        |
| <b>160</b> | Bahrain                        | Asia           | 142669           | 515            | 0.36        |
| <b>161</b> | Thailand                       | Asia           | 28773            | 94             | 0.33        |
| <b>162</b> | United Arab Emirates           | Asia           | 457071           | 1486           | 0.33        |
| <b>163</b> | Qatar                          | Asia           | 178464           | 286            | 0.16        |
| <b>164</b> | Faroe Islands                  | Europe         | 661              | 1              | 0.15        |
| <b>165</b> | Saint Barthelemy               | North America  | 857              | 1              | 0.12        |
| <b>166</b> | Mongolia                       | Asia           | 7589             | 6              | 0.08        |
| <b>167</b> | Singapore                      | Asia           | 60321            | 30             | 0.05        |
| <b>168</b> | Timor-Leste                    | Asia           | 512              | 0              | 0.00        |
| <b>169</b> | Saint Kitts and Nevis          | North America  | 44               | 0              | 0.00        |
| <b>170</b> | Sint Eustatius                 | South America  | 20               | 0              | 0.00        |
|            |                                | <b>Overall</b> | <b>126849230</b> | <b>2777747</b> | <b>2.19</b> |

**Supplementary Table 5:**Case Fatality Rate of 170 countries from six different continents

| <b>Asian country</b> | <b>Confirmed cases</b> | <b>Confirmed deaths</b> | <b>CFR</b>  |
|----------------------|------------------------|-------------------------|-------------|
| China                | 102715                 | 4851                    | 4.72        |
| Afghanistan          | 56384                  | 2476                    | 4.39        |
| Iran                 | 1864984                | 62478                   | 3.35        |
| Indonesia            | 1501093                | 40581                   | 2.70        |
| Myanmar              | 142393                 | 3206                    | 2.25        |
| Pakistan             | 659116                 | 14256                   | 2.16        |
| Japan                | 470175                 | 9086                    | 1.93        |
| Armenia              | 191491                 | 3497                    | 1.83        |
| Philippines          | 731894                 | 13186                   | 1.80        |
| Hong Kong            | 11,454                 | 205                     | 1.79        |
| Saudi Arabia         | 388866                 | 6656                    | 1.71        |
| Iraq                 | 838265                 | 14249                   | 1.70        |
| South Korea          | 103000                 | 1729                    | 1.68        |
| Bangladesh           | 600895                 | 8949                    | 1.49        |
| Brunei               | 207                    | 3                       | 1.45        |
| Vietnam              | 2594                   | 35                      | 1.35        |
| Georgia              | 281145                 | 3773                    | 1.34        |
| India                | 12095855               | 162114                  | 1.34        |
| Lebanon              | 462339                 | 6136                    | 1.33        |
| Kazakhstan           | 293761                 | 3696                    | 1.26        |
| Jordan               | 597256                 | 6651                    | 1.11        |
| Nepal                | 276980                 | 3027                    | 1.09        |
| Palestine            | 240000                 | 2614                    | 1.09        |
| Oman                 | 156883                 | 1662                    | 1.06        |
| Taiwan               | 1023                   | 10                      | 0.98        |
| Uzbekistan           | 82682                  | 628                     | 0.76        |
| Israel               | 831084                 | 6165                    | 0.74        |
| Sri Lanka            | 92303                  | 566                     | 0.61        |
| Kuwait               | 229550                 | 1298                    | 0.57        |
| Cambodia             | 2378                   | 11                      | 0.46        |
| Malaysia             | 342885                 | 1260                    | 0.37        |
| Bahrain              | 142669                 | 515                     | 0.36        |
| Thailand             | 28773                  | 94                      | 0.33        |
| United Arab Emirates | 457071                 | 1486                    | 0.33        |
| Qatar                | 178464                 | 286                     | 0.16        |
| Mongolia             | 7589                   | 6                       | 0.08        |
| Singapore            | 60321                  | 30                      | 0.05        |
| Timor-Leste          | 512                    | 0                       | 0.00        |
| <b>Overall</b>       | <b>24527049</b>        | <b>387471</b>           | <b>1.58</b> |

| <b>Africa country</b>           | <b>Confirmed cases</b> | <b>Confirmed deaths</b> | <b>CFR</b>  |
|---------------------------------|------------------------|-------------------------|-------------|
| Egypt                           | 200739                 | 11914                   | 5.94        |
| Zimbabwe                        | 36839                  | 1520                    | 4.13        |
| Union of the Comoros            | 3696                   | 146                     | 3.95        |
| Mali                            | 9921                   | 384                     | 3.87        |
| Eswatini                        | 17326                  | 667                     | 3.85        |
| Tunisia                         | 251169                 | 8760                    | 3.49        |
| South Africa                    | 1545979                | 52710                   | 3.41        |
| Gambia                          | 5420                   | 164                     | 3.03        |
| Lesotho                         | 10686                  | 315                     | 2.95        |
| Senegal                         | 38566                  | 1044                    | 2.71        |
| Democratic Republic of the Cong | 28011                  | 739                     | 2.64        |
| Algeria                         | 116946                 | 3084                    | 2.64        |
| Republic of the Congo           | 27794                  | 726                     | 2.61        |
| Sierra Leone                    | 3970                   | 79                      | 1.99        |
| Morocco                         | 494756                 | 8807                    | 1.78        |
| Libya                           | 157545                 | 2653                    | 1.68        |
| Madagascar                      | 23969                  | 394                     | 1.64        |
| Kenya                           | 131116                 | 2135                    | 1.63        |
| Cameroon                        | 47669                  | 721                     | 1.51        |
| Equatorial Guinea               | 6914                   | 102                     | 1.48        |
| Rwanda                          | 21490                  | 305                     | 1.42        |
| Ethiopia                        | 202545                 | 2825                    | 1.39        |
| Zambia                          | 88012                  | 1200                    | 1.36        |
| Botswana                        | 38466                  | 506                     | 1.32        |
| Benin                           | 7100                   | 90                      | 1.27        |
| Nigeria                         | 162641                 | 2049                    | 1.26        |
| Namibia                         | 43923                  | 513                     | 1.17        |
| Mozambique                      | 67292                  | 769                     | 1.14        |
| Burkina Faso                    | 12702                  | 145                     | 1.14        |
| Togo                            | 9992                   | 107                     | 1.07        |
| Mauritius                       | 963                    | 10                      | 1.04        |
| Uganda                          | 40820                  | 335                     | 0.82        |
| Ghana                           | 90287                  | 740                     | 0.82        |
| Mayotte                         | 19306                  | 154                     | 0.80        |
| Reunion                         | 15561                  | 102                     | 0.66        |
| Martinique                      | 7679                   | 50                      | 0.65        |
| Guinea                          | 19773                  | 123                     | 0.62        |
| Gabon                           | 19140                  | 114                     | 0.60        |
| Cote d'Ivoire                   | 43422                  | 239                     | 0.55        |
| <b>Overall</b>                  | <b>4070145</b>         | <b>107440</b>           | <b>2.64</b> |

| Europe                 | Confirmed cases | Confirmed deaths | CFR  |
|------------------------|-----------------|------------------|------|
| Bosnia and Herzegovina | 165787          | 6427             | 3.88 |
| Bulgaria               | 333250          | 12913            | 3.87 |
| Hungary                | 645733          | 20435            | 3.16 |
| Greece                 | 255755          | 7945             | 3.11 |
| Italy                  | 3544957         | 108350           | 3.06 |
| North Macedonia        | 127240          | 3716             | 2.92 |
| United Kingdom         | 4341736         | 126670           | 2.92 |
| Germany                | 2791822         | 76093            | 2.73 |
| Slovakia               | 359330          | 9624             | 2.68 |
| Belgium                | 872936          | 22921            | 2.63 |
| Romania                | 940443          | 23234            | 2.47 |
| Spain                  | 3270825         | 75199            | 2.30 |
| Poland                 | 2288826         | 52392            | 2.29 |
| Croatia                | 269009          | 5928             | 2.20 |
| Gibraltar              | 4273            | 94               | 2.20 |
| Russia                 | 4536820         | 98442            | 2.17 |
| Moldova                | 228370          | 4915             | 2.15 |
| France                 | 4481165         | 94402            | 2.11 |
| Kosovo                 | 88712           | 1834             | 2.07 |
| Portugal               | 820716          | 16843            | 2.05 |
| Slovenia               | 212965          | 4311             | 2.02 |
| Ireland                | 235078          | 4667             | 1.99 |
| Liechtenstein          | 2747            | 54               | 1.97 |
| Ukraine                | 1662942         | 32418            | 1.95 |
| Latvia                 | 101207          | 1883             | 1.86 |
| Albania                | 124419          | 2216             | 1.78 |
| Czech Republic         | 1523668         | 26222            | 1.72 |
| Sweden                 | 780018          | 13402            | 1.72 |
| Austria                | 536751          | 9030             | 1.68 |
| Lithuania              | 215216          | 3566             | 1.66 |
| Switzerland            | 594043          | 9589             | 1.61 |
| Montenegro             | 90416           | 1245             | 1.38 |
| Azerbaijan             | 257330          | 3513             | 1.37 |
| Malta                  | 28938           | 388              | 1.34 |
| Netherlands            | 1259155         | 16475            | 1.31 |
| Monaco                 | 2265            | 28               | 1.24 |
| Luxembourg             | 61073           | 741              | 1.21 |
| Finland                | 76425           | 822              | 1.08 |
| Denmark                | 228692          | 2415             | 1.06 |
| Andorra                | 11888           | 115              | 0.97 |
| Turkey                 | 3240577         | 31230            | 0.96 |
| Serbia                 | 590018          | 5231             | 0.89 |
| Estonia                | 105416          | 896              | 0.85 |
| Norway                 | 93145           | 660              | 0.71 |
| Belarus                | 319599          | 2227             | 0.70 |



|                |                 |               |             |
|----------------|-----------------|---------------|-------------|
| Cyprus         | 44991           | 254           | 0.56        |
| Iceland        | 6183            | 29            | 0.47        |
| Faroe Islands  | 661             | 1             | 0.15        |
| <b>Overall</b> | <b>42773531</b> | <b>942005</b> | <b>2.20</b> |

| <b>North America</b>           | <b>Confirmed cases</b> | <b>Confirmed deaths</b> | <b>CFR</b>  |
|--------------------------------|------------------------|-------------------------|-------------|
| Mexico                         | 2226550                | 201623                  | 9.06        |
| Guatemala                      | 193556                 | 6809                    | 3.52        |
| El Salvador                    | 64431                  | 2003                    | 3.11        |
| Belize                         | 12411                  | 317                     | 2.55        |
| Antigua and Barbuda            | 1136                   | 28                      | 2.46        |
| Canada                         | 965404                 | 22880                   | 2.37        |
| USA                            | 29968464               | 544430                  | 1.82        |
| Panama                         | 353839                 | 6100                    | 1.72        |
| Jamaica                        | 38514                  | 586                     | 1.52        |
| Guadeloupe                     | 11512                  | 173                     | 1.50        |
| Saint Lucia                    | 4202                   | 58                      | 1.38        |
| Costa Rica                     | 215178                 | 2931                    | 1.36        |
| Dominican Republic             | 252182                 | 3307                    | 1.31        |
| Bermuda                        | 1028                   | 12                      | 1.17        |
| Barbados                       | 3629                   | 41                      | 1.13        |
| Saint Martin                   | 1657                   | 12                      | 0.72        |
| British Virgin Islands         | 154                    | 1                       | 0.65        |
| Saint Vincent and the Grenadin | 1739                   | 10                      | 0.58        |
| Cuba                           | 73204                  | 417                     | 0.57        |
| Cayman Islands                 | 487                    | 2                       | 0.41        |
| Saint Barthelemy               | 857                    | 1                       | 0.12        |
| Saint Kitts and Nevis          | 44                     | 0                       | 0.00        |
| <b>Overall</b>                 | <b>34390178</b>        | <b>791741</b>           | <b>2.30</b> |

| Oceania                  | Confirmed cases | Confirmed deaths | CFR         |
|--------------------------|-----------------|------------------|-------------|
| Australia                | 29278           | 909              | 3.10        |
| Guam                     | 7594            | 134              | 1.76        |
| Northern Mariana Islands | 159             | 2                | 1.26        |
| New Zealand              | 2139            | 26               | 1.22        |
| Papua New Guinea         | 5620            | 56               | 1.00        |
|                          |                 |                  |             |
| <b>Overall</b>           | <b>44790</b>    | <b>1127</b>      | <b>2.52</b> |

| <b>South America</b> | <b>Confirmed cases</b> | <b>Confirmed deaths</b> | <b>CFR</b>  |
|----------------------|------------------------|-------------------------|-------------|
| Ecuador              | 325124                 | 16746                   | 5.15        |
| Bolivia              | 269628                 | 12186                   | 4.52        |
| Guatemala            | 193556                 | 6809                    | 3.52        |
| Peru                 | 1529882                | 51469                   | 3.36        |
| Colombia             | 2382730                | 62955                   | 2.64        |
| Brazil               | 12534688               | 312206                  | 2.49        |
| Argentina            | 2308597                | 55449                   | 2.40        |
| Chile                | 984484                 | 23070                   | 2.34        |
| Paraguay             | 208655                 | 4063                    | 1.95        |
| Suriname             | 9097                   | 177                     | 1.95        |
| Trinidad             | 7977                   | 142                     | 1.78        |
| Venezuela            | 156655                 | 1565                    | 1.00        |
| Uruguay              | 97406                  | 915                     | 0.94        |
| Aruba                | 9259                   | 82                      | 0.89        |
| Bonaire              | 1299                   | 10                      | 0.77        |
| French Guiana        | 16922                  | 89                      | 0.53        |
| Curacao              | 7558                   | 30                      | 0.40        |
| Sint Eustatius       | 20                     | 0                       | 0.00        |
| <b>Overall</b>       | <b>21043537</b>        | <b>547963</b>           | <b>2.60</b> |

**Supplementary Table 6:** Case Fatality Rate of 170 countries from six different continents

| No. | Country                         | Continent     | Total confirmed cases | Total confirmed deaths | CFR  | Predominant clade |
|-----|---------------------------------|---------------|-----------------------|------------------------|------|-------------------|
| 1   | Bolivia                         | South America | 269628                | 12186                  | 4.52 | G                 |
| 2   | Bosnia and Herzegovina          | Europe        | 165787                | 6427                   | 3.88 | G                 |
| 3   | Gambia                          | Africa        | 5420                  | 164                    | 3.03 | G                 |
| 4   | Senegal                         | Africa        | 38566                 | 1044                   | 2.71 | G                 |
| 5   | Democratic Republic of the Cong | Africa        | 28011                 | 739                    | 2.64 | G                 |
| 6   | Algeria                         | Africa        | 116946                | 3084                   | 2.64 | G                 |
| 7   | Romania                         | Europe        | 940443                | 23234                  | 2.47 | G                 |
| 8   | Croatia                         | Europe        | 269009                | 5928                   | 2.20 | G                 |
| 9   | Pakistan                        | Asia          | 659116                | 14256                  | 2.16 | G                 |
| 10  | Moldova                         | Europe        | 228370                | 4915                   | 2.15 | G                 |
| 11  | Slovenia                        | Europe        | 212965                | 4311                   | 2.02 | G                 |
| 12  | Liechtenstein                   | Europe        | 2747                  | 54                     | 1.97 | G                 |
| 13  | Paraguay                        | South America | 208655                | 4063                   | 1.95 | G                 |
| 14  | Suriname                        | South America | 9097                  | 177                    | 1.95 | G                 |
| 15  | Morocco                         | Africa        | 494756                | 8807                   | 1.78 | G                 |
| 16  | Guam                            | Oceania       | 7594                  | 134                    | 1.76 | G                 |
| 17  | Czech Republic                  | Europe        | 1523668               | 26222                  | 1.72 | G                 |
| 18  | Austria                         | Europe        | 536751                | 9030                   | 1.68 | G                 |
| 19  | Kenya                           | Africa        | 131116                | 2135                   | 1.63 | G                 |
| 20  | Cameroon                        | Africa        | 47669                 | 721                    | 1.51 | G                 |
| 21  | Equatorial Guinea               | Africa        | 6914                  | 102                    | 1.48 | G                 |
| 22  | Rwanda                          | Africa        | 21490                 | 305                    | 1.42 | G                 |
| 23  | Lebanon                         | Asia          | 462339                | 6136                   | 1.33 | G                 |
| 24  | Netherlands                     | Europe        | 1259155               | 16475                  | 1.31 | G                 |
| 25  | Venezuela                       | South America | 156655                | 1565                   | 1.00 | G                 |
| 26  | Guinea                          | Africa        | 19773                 | 123                    | 0.62 | G                 |
| 27  | Cuba                            | North America | 73204                 | 417                    | 0.57 | G                 |
| 28  | Cyprus                          | Europe        | 44991                 | 254                    | 0.56 | G                 |
| 29  | Malaysia                        | Asia          | 342885                | 1260                   | 0.37 | G                 |
| 30  | Faroe Islands                   | Europe        | 661                   | 1                      | 0.15 | G                 |
| 31  | Mongolia                        | Asia          | 7589                  | 6                      | 0.08 | G                 |
| 32  | Afghanistan                     | Asia          | 56384                 | 2476                   | 4.39 | GH                |

|    |                          |               |          |        |      |           |
|----|--------------------------|---------------|----------|--------|------|-----------|
| 33 | Guatemala                | North America | 193556   | 6809   | 3.52 | <b>GH</b> |
| 34 | Tunisia                  | Africa        | 251169   | 8760   | 3.49 | <b>GH</b> |
| 35 | Hungary                  | Europe        | 645733   | 20435  | 3.16 | <b>GH</b> |
| 36 | El Salvador              | North America | 64431    | 2003   | 3.11 | <b>GH</b> |
| 37 | Indonesia                | Asia          | 1501093  | 40581  | 2.70 | <b>GH</b> |
| 38 | Colombia                 | South America | 2382730  | 62955  | 2.64 | <b>GH</b> |
| 39 | Republic of the Congo    | Africa        | 27794    | 726    | 2.61 | <b>GH</b> |
| 40 | Antigua and Barbuda      | North America | 1136     | 28     | 2.46 | <b>GH</b> |
| 41 | Argentina                | South America | 2308597  | 55449  | 2.40 | <b>GH</b> |
| 42 | Canada                   | North America | 965404   | 22880  | 2.37 | <b>GH</b> |
| 43 | Myanmar                  | Asia          | 142393   | 3206   | 2.25 | <b>GH</b> |
| 44 | France                   | Europe        | 4481165  | 94402  | 2.11 | <b>GH</b> |
| 45 | USA                      | North America | 29968464 | 544430 | 1.82 | <b>GH</b> |
| 46 | Hong Kong                | Asia          | 11,454   | 205    | 1.79 | <b>GH</b> |
| 47 | Trinidad                 | South America | 7977     | 142    | 1.78 | <b>GH</b> |
| 48 | Saudi Arabia             | Asia          | 388866   | 6656   | 1.71 | <b>GH</b> |
| 49 | South Korea              | Asia          | 103000   | 1729   | 1.68 | <b>GH</b> |
| 50 | Switzerland              | Europe        | 594043   | 9589   | 1.61 | <b>GH</b> |
| 51 | Jamaica                  | North America | 38514    | 586    | 1.52 | <b>GH</b> |
| 52 | Guadeloupe               | North America | 11512    | 173    | 1.50 | <b>GH</b> |
| 53 | Georgia                  | Asia          | 281145   | 3773   | 1.34 | <b>GH</b> |
| 54 | Malta                    | Europe        | 28938    | 388    | 1.34 | <b>GH</b> |
| 55 | Benin                    | Africa        | 7100     | 90     | 1.27 | <b>GH</b> |
| 56 | Northern Mariana Islands | Oceania       | 159      | 2      | 1.26 | <b>GH</b> |
| 57 | Luxembourg               | Europe        | 61073    | 741    | 1.21 | <b>GH</b> |
| 58 | Bermuda                  | North America | 1028     | 12     | 1.17 | <b>GH</b> |
| 59 | Finland                  | Europe        | 76425    | 822    | 1.08 | <b>GH</b> |
| 60 | Mauritius                | Africa        | 963      | 10     | 1.04 | <b>GH</b> |
| 61 | Taiwan                   | Asia          | 1023     | 10     | 0.98 | <b>GH</b> |
| 62 | Aruba                    | South America | 9259     | 82     | 0.89 | <b>GH</b> |
| 63 | Saint Martin             | North America | 1657     | 12     | 0.72 | <b>GH</b> |
| 64 | Belarus                  | Europe        | 319599   | 2227   | 0.70 | <b>GH</b> |
| 65 | Reunion                  | Africa        | 15561    | 102    | 0.66 | <b>GH</b> |

|    |                                |               |          |        |      |           |
|----|--------------------------------|---------------|----------|--------|------|-----------|
| 66 | British Virgin Islands         | North America | 154      | 1      | 0.65 | <b>GH</b> |
| 67 | Sri Lanka                      | Asia          | 92303    | 566    | 0.61 | <b>GH</b> |
| 68 | Saint Vincent and the Grenadin | North America | 1739     | 10     | 0.58 | <b>GH</b> |
| 69 | Kuwait                         | Asia          | 229550   | 1298   | 0.57 | <b>GH</b> |
| 70 | French Guiana                  | South America | 16922    | 89     | 0.53 | <b>GH</b> |
| 71 | Thailand                       | Asia          | 28773    | 94     | 0.33 | <b>GH</b> |
| 72 | Saint Kitts and Nevis          | North America | 44       | 0      | 0.00 | <b>GH</b> |
| 73 | Sint Eustatius                 | South America | 20       | 0      | 0.00 | <b>GH</b> |
| 74 | Mexico                         | North America | 2226550  | 201623 | 9.06 | <b>GR</b> |
| 75 | Egypt                          | Africa        | 200739   | 11914  | 5.94 | <b>GR</b> |
| 76 | Ecuador                        | South America | 325124   | 16746  | 5.15 | <b>GR</b> |
| 77 | South Africa                   | Africa        | 1545979  | 52710  | 3.41 | <b>GR</b> |
| 78 | Peru                           | South America | 1529882  | 51469  | 3.36 | <b>GR</b> |
| 79 | Greece                         | Europe        | 255755   | 7945   | 3.11 | <b>GR</b> |
| 80 | Australia                      | Oceania       | 29278    | 909    | 3.10 | <b>GR</b> |
| 81 | North Macedonia                | Europe        | 127240   | 3716   | 2.92 | <b>GR</b> |
| 82 | Brazil                         | South America | 12534688 | 312206 | 2.49 | <b>GR</b> |
| 83 | Chile                          | South America | 984484   | 23070  | 2.34 | <b>GR</b> |
| 84 | Russia                         | Europe        | 4536820  | 98442  | 2.17 | <b>GR</b> |
| 85 | Kosovo                         | Europe        | 88712    | 1834   | 2.07 | <b>GR</b> |
| 86 | Portugal                       | Europe        | 820716   | 16843  | 2.05 | <b>GR</b> |
| 87 | Ukraine                        | Europe        | 1662942  | 32418  | 1.95 | <b>GR</b> |
| 88 | Japan                          | Asia          | 470175   | 9086   | 1.93 | <b>GR</b> |
| 89 | Latvia                         | Europe        | 101207   | 1883   | 1.86 | <b>GR</b> |
| 90 | Armenia                        | Asia          | 191491   | 3497   | 1.83 | <b>GR</b> |
| 91 | Philippines                    | Asia          | 731894   | 13186  | 1.80 | <b>GR</b> |
| 92 | Bangladesh                     | Asia          | 600895   | 8949   | 1.49 | <b>GR</b> |
| 93 | Montenegro                     | Europe        | 90416    | 1245   | 1.38 | <b>GR</b> |
| 94 | Azerbaijan                     | Europe        | 257330   | 3513   | 1.37 | <b>GR</b> |
| 95 | Zambia                         | Africa        | 88012    | 1200   | 1.36 | <b>GR</b> |
| 96 | Costa Rica                     | North America | 215178   | 2931   | 1.36 | <b>GR</b> |
| 97 | Vietnam                        | Asia          | 2594     | 35     | 1.35 | <b>GR</b> |
| 98 | India                          | Asia          | 12095855 | 162114 | 1.34 | <b>GR</b> |

|     |                      |               |         |        |      |    |
|-----|----------------------|---------------|---------|--------|------|----|
| 99  | Nigeria              | Africa        | 162641  | 2049   | 1.26 | GR |
| 100 | New Zealand          | Oceania       | 2139    | 26     | 1.22 | GR |
| 101 | Namibia              | Africa        | 43923   | 513    | 1.17 | GR |
| 102 | Mozambique           | Africa        | 67292   | 769    | 1.14 | GR |
| 103 | Jordan               | Asia          | 597256  | 6651   | 1.11 | GR |
| 104 | Palestine            | Asia          | 240000  | 2614   | 1.09 | GR |
| 105 | Oman                 | Asia          | 156883  | 1662   | 1.06 | GR |
| 106 | Turkey               | Europe        | 3240577 | 31230  | 0.96 | GR |
| 107 | Uruguay              | South America | 97406   | 915    | 0.94 | GR |
| 108 | Serbia               | Europe        | 590018  | 5231   | 0.89 | GR |
| 109 | Estonia              | Europe        | 105416  | 896    | 0.85 | GR |
| 110 | Ghana                | Africa        | 90287   | 740    | 0.82 | GR |
| 111 | Israel               | Asia          | 831084  | 6165   | 0.74 | GR |
| 112 | Norway               | Europe        | 93145   | 660    | 0.71 | GR |
| 113 | Martinique           | Africa        | 7679    | 50     | 0.65 | GR |
| 114 | Bahrain              | Asia          | 142669  | 515    | 0.36 | GR |
| 115 | United Arab Emirates | Asia          | 457071  | 1486   | 0.33 | GR |
| 116 | Italy                | Europe        | 3544957 | 108350 | 3.06 | GV |
| 117 | Spain                | Europe        | 3270825 | 75199  | 2.30 | GV |
| 118 | Gibraltar            | Europe        | 4273    | 94     | 2.20 | GV |
| 119 | Sweden               | Europe        | 780018  | 13402  | 1.72 | GV |
| 120 | Lithuania            | Europe        | 215216  | 3566   | 1.66 | GV |
| 121 | Monaco               | Europe        | 2265    | 28     | 1.24 | GV |
| 122 | Denmark              | Europe        | 228692  | 2415   | 1.06 | GV |
| 123 | Iceland              | Europe        | 6183    | 29     | 0.47 | GV |
| 124 | China                | Asia          | 102715  | 4851   | 4.72 | L  |
| 125 | Mali                 | Africa        | 9921    | 384    | 3.87 | S  |
| 126 | Sierra Leone         | Africa        | 3970    | 79     | 1.99 | S  |
| 127 | Panama               | North America | 353839  | 6100   | 1.72 | S  |
| 128 | Brunei               | Asia          | 207     | 3      | 1.45 | S  |
| 129 | Burkina Faso         | Africa        | 12702   | 145    | 1.14 | S  |
| 130 | Togo                 | Africa        | 9992    | 107    | 1.07 | S  |
| 131 | Uganda               | Africa        | 40820   | 335    | 0.82 | S  |



|     |                    |               |         |        |      |                    |
|-----|--------------------|---------------|---------|--------|------|--------------------|
| 132 | Cote d'Ivoire      | Africa        | 43422   | 239    | 0.55 | <b>S</b>           |
| 133 | Iran               | Asia          | 1864984 | 62478  | 3.35 | <b>O</b>           |
| 134 | Iraq               | Asia          | 838265  | 14249  | 1.70 | <b>O</b>           |
| 135 | Libya              | Africa        | 157545  | 2653   | 1.68 | <b>O</b>           |
| 136 | Ethiopia           | Africa        | 202545  | 2825   | 1.39 | <b>O</b>           |
| 137 | Dominican Republic | North America | 252182  | 3307   | 1.31 | <b>O</b>           |
| 138 | Kazakhstan         | Asia          | 293761  | 3696   | 1.26 | <b>O</b>           |
| 139 | Papua New Guinea   | Oceania       | 5620    | 56     | 1.00 | <b>O</b>           |
| 140 | Andorra            | Europe        | 11888   | 115    | 0.97 | <b>O</b>           |
| 141 | Uzbekistan         | Asia          | 82682   | 628    | 0.76 | <b>O</b>           |
| 142 | Gabon              | Africa        | 19140   | 114    | 0.60 | <b>O</b>           |
| 143 | Cambodia           | Asia          | 2378    | 11     | 0.46 | <b>O</b>           |
| 144 | Qatar              | Asia          | 178464  | 286    | 0.16 | <b>O</b>           |
| 145 | Singapore          | Asia          | 60321   | 30     | 0.05 | <b>O</b>           |
| 146 | Timor-Leste        | Asia          | 512     | 0      | 0.00 | <b>O</b>           |
| 147 | Guatemala          | South America | 193556  | 6809   | 3.52 | <b>G/GH</b>        |
| 148 | Saint Barthelemy   | North America | 857     | 1      | 0.12 | <b>G/GH</b>        |
| 149 | Belize             | North America | 12411   | 317    | 2.55 | <b>GH/GR</b>       |
| 150 | Nepal              | Asia          | 276980  | 3027   | 1.09 | <b>GH/GR</b>       |
| 151 | Madagascar         | Africa        | 23969   | 394    | 1.64 | <b>GH/GR/O</b>     |
| 152 | Bulgaria           | Europe        | 333250  | 12913  | 3.87 | <b>GRY/B.1.1.7</b> |
| 153 | United Kingdom     | Europe        | 4341736 | 126670 | 2.92 | <b>GRY/B.1.1.7</b> |
| 154 | Germany            | Europe        | 2791822 | 76093  | 2.73 | <b>GRY/B.1.1.7</b> |
| 155 | Slovakia           | Europe        | 359330  | 9624   | 2.68 | <b>GRY/B.1.1.7</b> |
| 156 | Belgium            | Europe        | 872936  | 22921  | 2.63 | <b>GRY/B.1.1.7</b> |
| 157 | Poland             | Europe        | 2288826 | 52392  | 2.29 | <b>GRY/B.1.1.7</b> |
| 158 | Ireland            | Europe        | 235078  | 4667   | 1.99 | <b>GRY/B.1.1.7</b> |
| 159 | Albania            | Europe        | 124419  | 2216   | 1.78 | <b>GRY/B.1.1.7</b> |
| 160 | Saint Lucia        | North America | 4202    | 58     | 1.38 | <b>GRY/B.1.1.7</b> |
| 161 | Barbados           | North America | 3629    | 41     | 1.13 | <b>GRY/B.1.1.7</b> |
| 162 | Bonaire            | South America | 1299    | 10     | 0.77 | <b>GRY/B.1.1.7</b> |
| 163 | Cayman Islands     | North America | 487     | 2      | 0.41 | <b>GRY/B.1.1.7</b> |
| 164 | Curacao            | South America | 7558    | 30     | 0.40 | <b>GRY/B.1.1.7</b> |

|     |                      |        |       |      |      |                |
|-----|----------------------|--------|-------|------|------|----------------|
| 165 | Zimbabwe             | Africa | 36839 | 1520 | 4.13 | <b>B.1.351</b> |
| 166 | Union of the Comoros | Africa | 3696  | 146  | 3.95 | <b>B.1.351</b> |
| 167 | Eswatini             | Africa | 17326 | 667  | 3.85 | <b>B.1.351</b> |
| 168 | Lesotho              | Africa | 10686 | 315  | 2.95 | <b>B.1.351</b> |
| 169 | Botswana             | Africa | 38466 | 506  | 1.32 | <b>B.1.351</b> |
| 170 | Mayotte              | Africa | 19306 | 154  | 0.80 | <b>B.1.351</b> |

**Supplementary Table 7:** Case Fatality Rate of different countries according to predominant clade
